# Supplementary material for: Microwave-Assisted Atom Transfer Radical Cyclization in the Synthesis of 3,3-Dichloro-γ- and δ-Lactams from N-Alkenyl-Tethered Trichloroacetamides Catalyzed by RuCl2(PPh3)3 and Their Cytotoxic Evaluation
Source: MDPI journal article supplement (doi:10.3390/molecules29092035), 2024-04-28

Supplementary Material for

**Microwave-Assisted Atom Transfer Radical Cyclization in the Synthesis of 3,3-Dichloro- $\gamma$ - and  $\delta$ -Lactams from *N*-Alkenyl-Tethered Trichloroacetamides Catalyzed by  $\text{RuCl}_2(\text{PPh}_3)_3$  and their Cytotoxic Evaluation**

Faïza Diaba<sup>1,\*</sup>, Alexandra G. Sandor<sup>1</sup>, María del Carmen Morán<sup>2,3</sup>

<sup>1</sup> Laboratori de Química Orgànica, Facultat de Farmàcia i Ciències de l'Alimentació, IBUB, Universitat de Barcelona, Av. Joan XXIII 27-31, 08028 Barcelona, Spain

<sup>2</sup> Departament de Bioquímica i Fisiologia-Secció de Fisiologia, Facultat de Farmàcia i Ciències de l'Alimentació, Universitat de Barcelona, Avda. Joan XXIII 27-31, 08028 Barcelona, Spain

<sup>3</sup> Institut de Nanociència i Nanotecnologia—IN2UB, Universitat de Barcelona, Avda. Diagonal, 645, 08028 Barcelona, Spain

\* Correspondence: [faiza.diaba@ub.edu](mailto:faiza.diaba@ub.edu); Tel.: 34934035849

- Copies of  $^1\text{H}$  NMR and  $^{13}\text{C}$  NMR spectra of **1j** S2
- Copies of  $^1\text{H}$  NMR and  $^{13}\text{C}$  NMR spectra of lactams **2a-2o** S3-S21
- Copies of  $^1\text{H}$  NMR and  $^{13}\text{C}$  NMR spectra of lactam **3a** S22

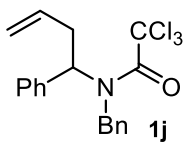

VNMRS400A\_17072020\_XGT041-6-H1  
 VNMRS400F / Num.Inv. 205984  
 cdc13 / Temp: 25C / N.Reg: XXXXXXXXXX  
 Usuari: san / Mostra: XGT041-6  
 Nom: FAIZA DIABA  
 Data: 17/07/20 / Ope.: F.DIABA

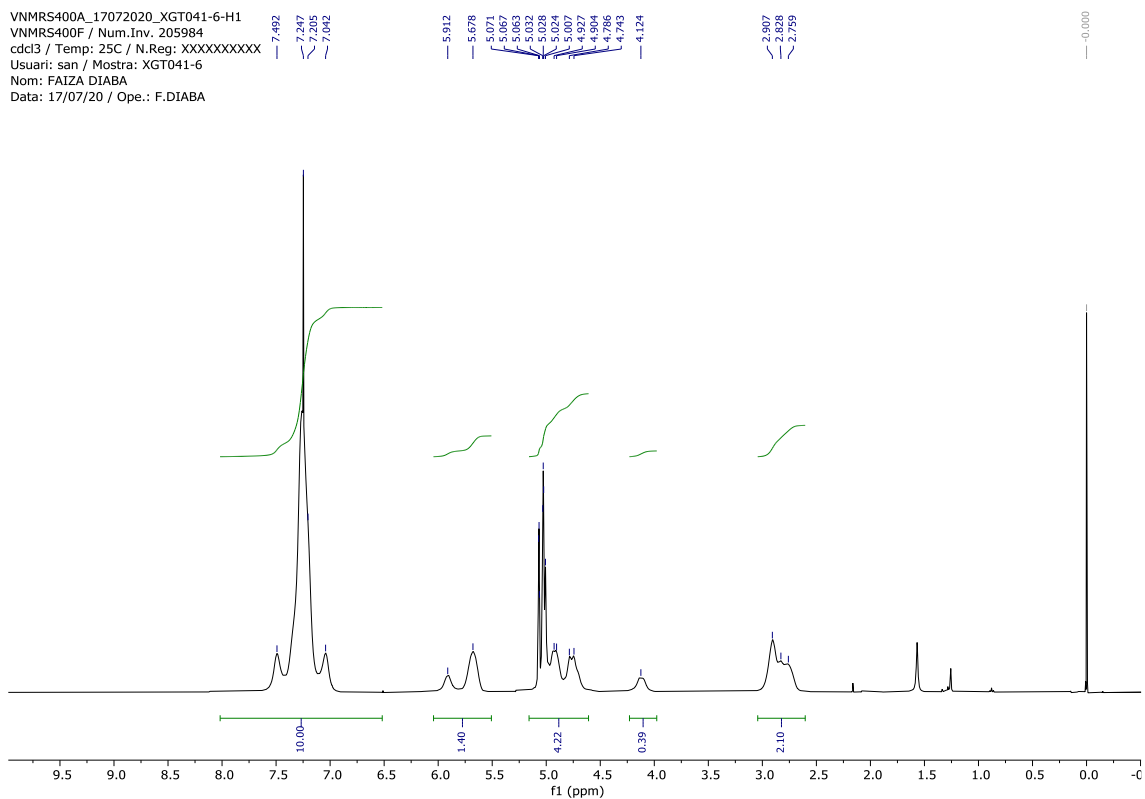

VNMRS400A\_17072020\_XGT041-6-C13  
 VNMRS400F / Num.Inv. 205984  
 cdc13 / Temp: 25C / N.Reg: XXXXXXXXXX  
 Usuari: san / Mostra: XGT041-6  
 Nom: FAIZA DIABA  
 Data: 17/07/20 / Ope.: F.DIABA

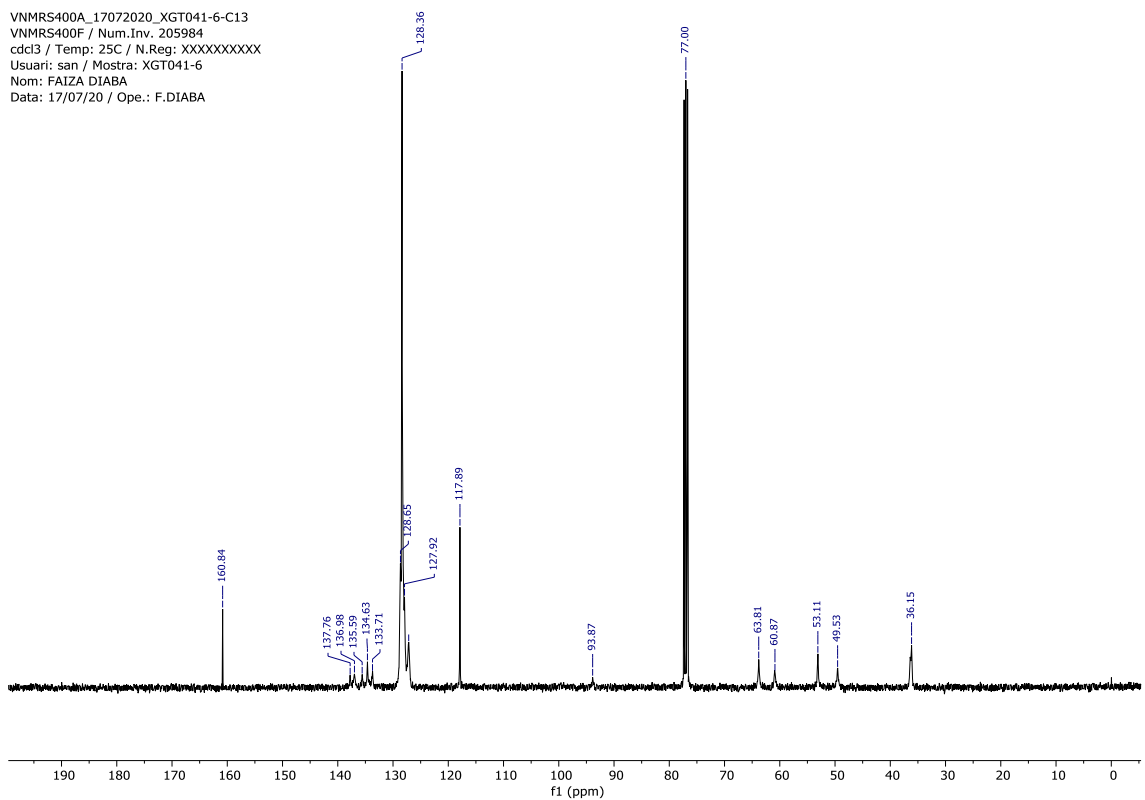

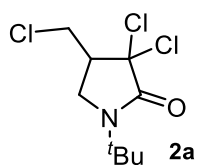

VNMRS400A\_01122020\_as388-13-H1  
 VNMRS400F / Num.Inv. 205984  
 cdc13 / Temp: 25C / N.Reg: XXXXXXXXXX  
 Usuari: san / Mostra: as388-13  
 Nom: ALEXANDRA SANDOR  
 Data: 01/12/20 / Ope.: A.SANDOR

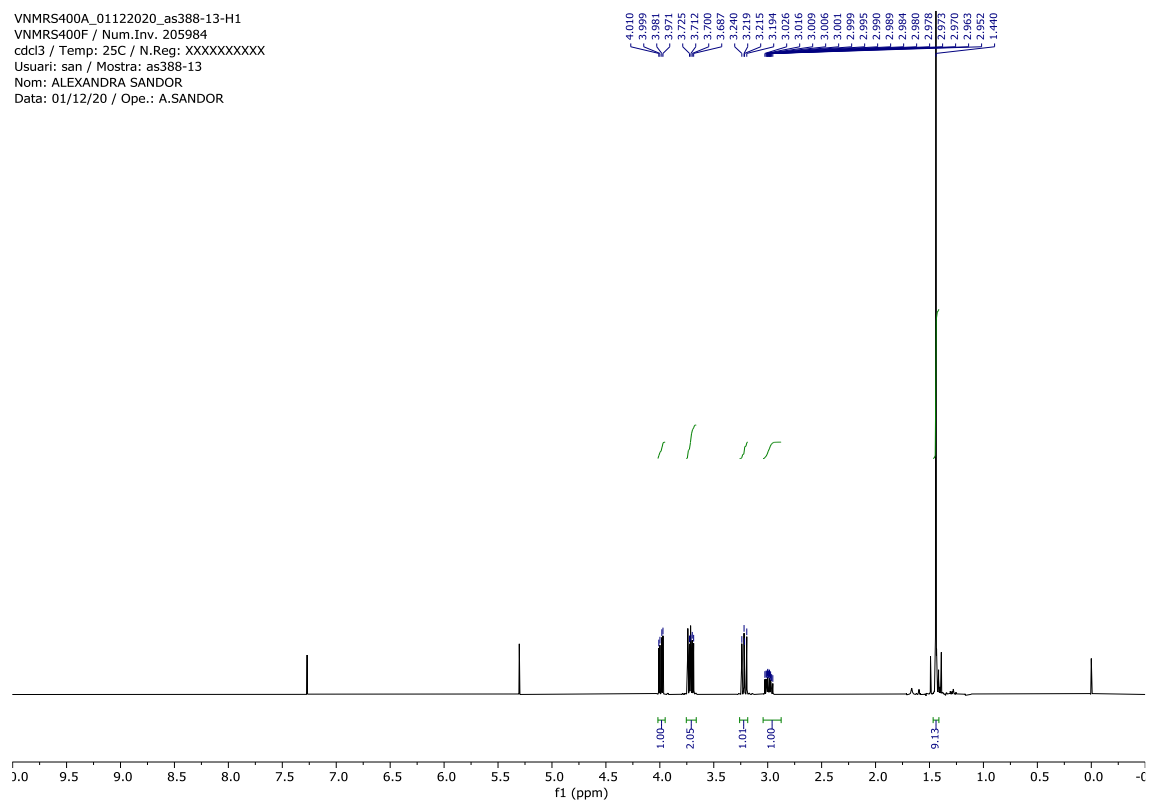

VNMRS400A\_01122020\_as388-13-C13  
 VNMRS400F / Num.Inv. 205984  
 cdc13 / Temp: 25C / N.Reg: XXXXXXXXXX  
 Usuari: san / Mostra: as388-13  
 Nom: ALEXANDRA SANDOR  
 Data: 01/12/20 / Ope.: A.SANDOR

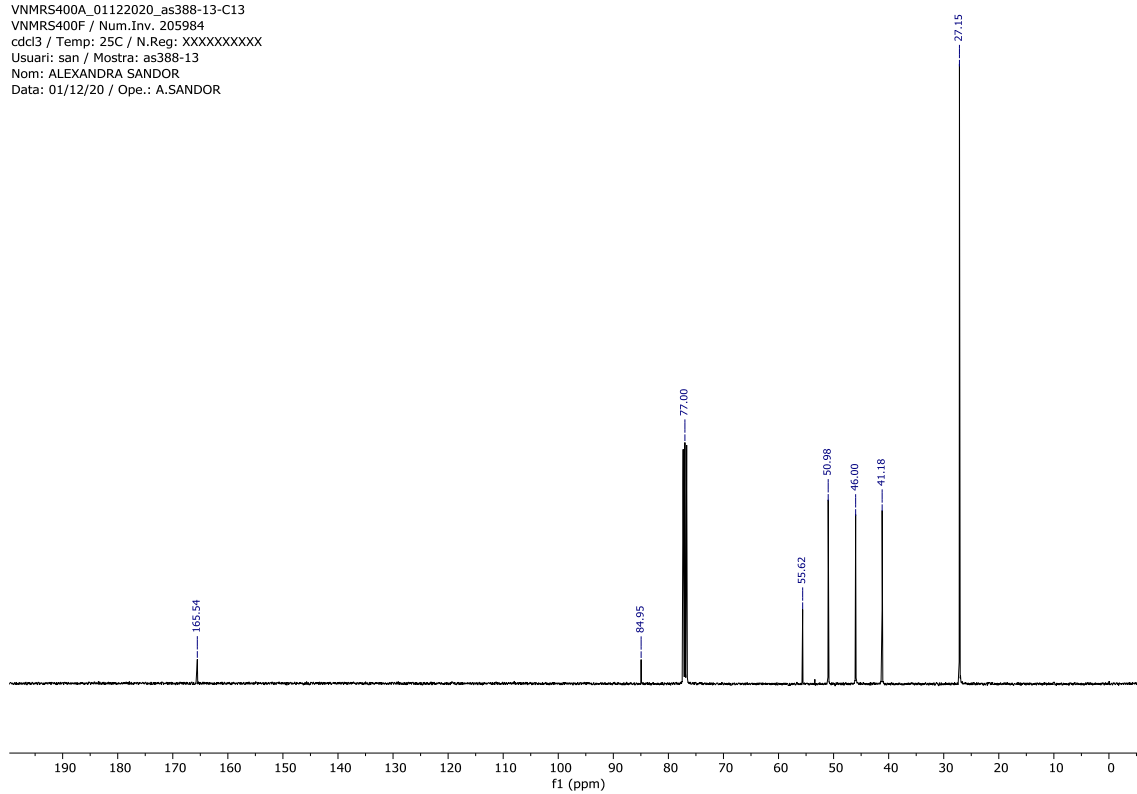

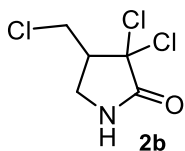

23100167\_B400FA\_21102023\_XAS416.1.fid  
 Equip: B400F / N.Inv: 1037597  
 N.Reg: 23100167  
 Usuari: san / Mostra: XAS416  
 Nom: FAIZA DIABA NOUARA  
 Data: 21/10/2023 09:25:31 h./ Ope.: AUTOSERVEI  
 Experiment: A-H1-zg30 Solvent: CDCl3

7.265 CDCl3  
 7.184

5.302  
 4.013  
 4.022  
 4.012  
 4.011  
 3.995  
 3.984  
 3.984  
 3.983  
 3.782  
 3.757  
 3.754  
 3.754  
 3.744  
 3.729  
 3.717  
 3.713  
 3.709  
 3.705  
 3.692  
 3.688  
 3.306  
 3.285  
 3.281  
 3.277  
 3.277  
 3.216  
 3.210  
 3.206  
 3.202  
 3.199  
 3.195  
 3.191  
 3.189  
 3.185  
 3.182  
 3.174  
 3.171  
 3.164  
 3.155  
 1.560 H2O  
 1.255

0.000

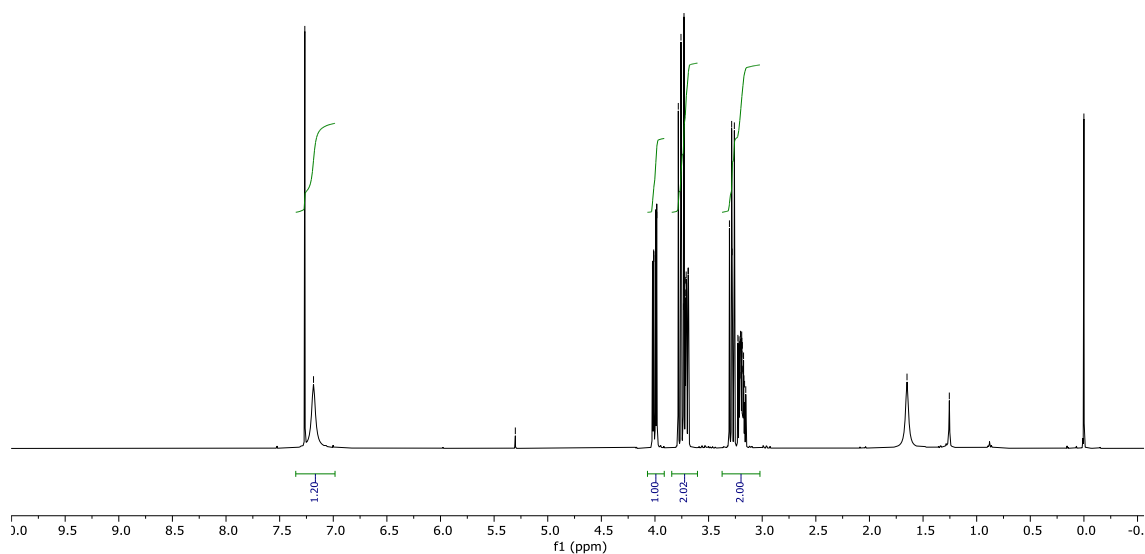

23100167\_B400FA\_21102023\_XAS416.2.fid  
 Equip: B400F / N.Inv: 1037597  
 N.Reg: 23100167  
 Usuari: san / Mostra: XAS416  
 Nom: FAIZA DIABA NOUARA  
 Data: 21/10/2023 09:25:31 h./ Ope.: AUTOSERVEI  
 Experiment: A-C13-zgpg30 Solvent: CDCl3

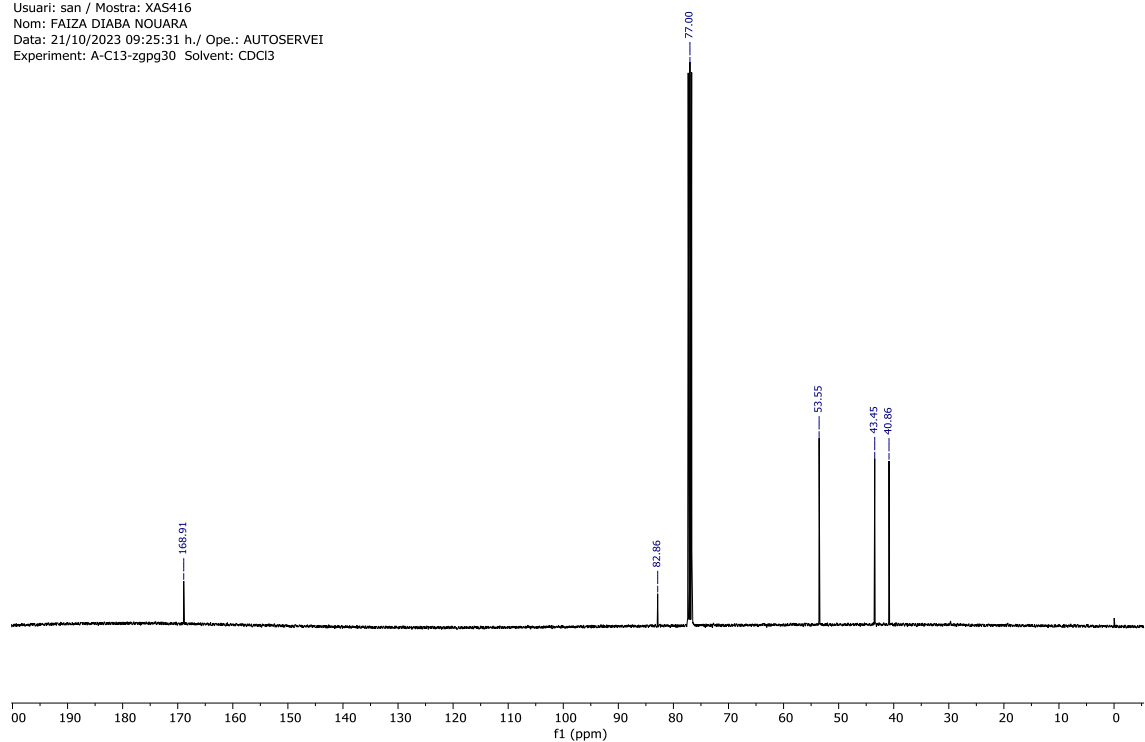

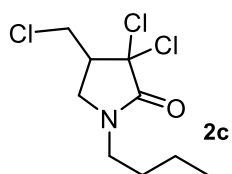

VNMRS400A\_27012021\_AS414-14-H1  
 VNMRS400F / Num.Inv. 205984  
 cdc13 / Temp: 25C / N.Reg: XXXXXXXXXX  
 Usuari: san / Mostra: AS414-14  
 Nom: ALEXANDRA SANDOR  
 Data: 27/01/21 / Ope.: A.SANDOR

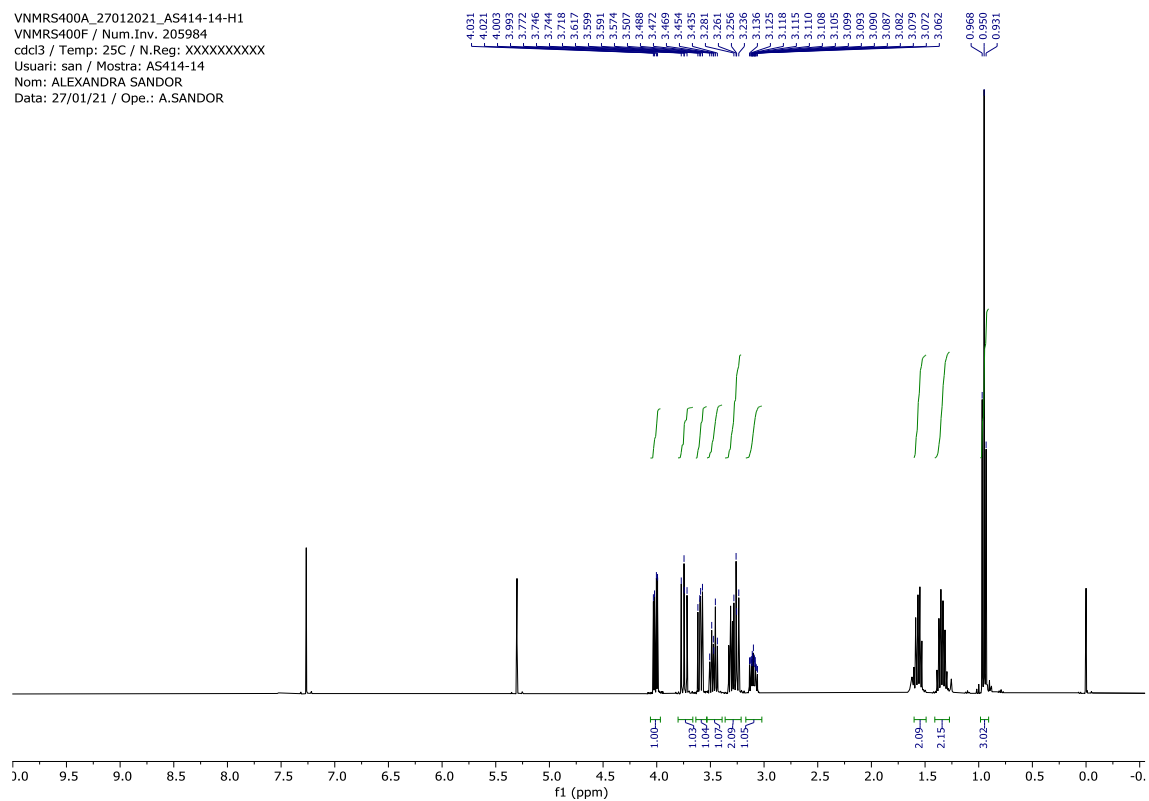

VNMRS400A\_27012021\_AS414-14-C13  
 VNMRS400F / Num.Inv. 205984  
 cdc13 / Temp: 25C / N.Reg: XXXXXXXXXX  
 Usuari: san / Mostra: AS414-14  
 Nom: ALEXANDRA SANDOR  
 Data: 27/01/21 / Ope.: A.SANDOR

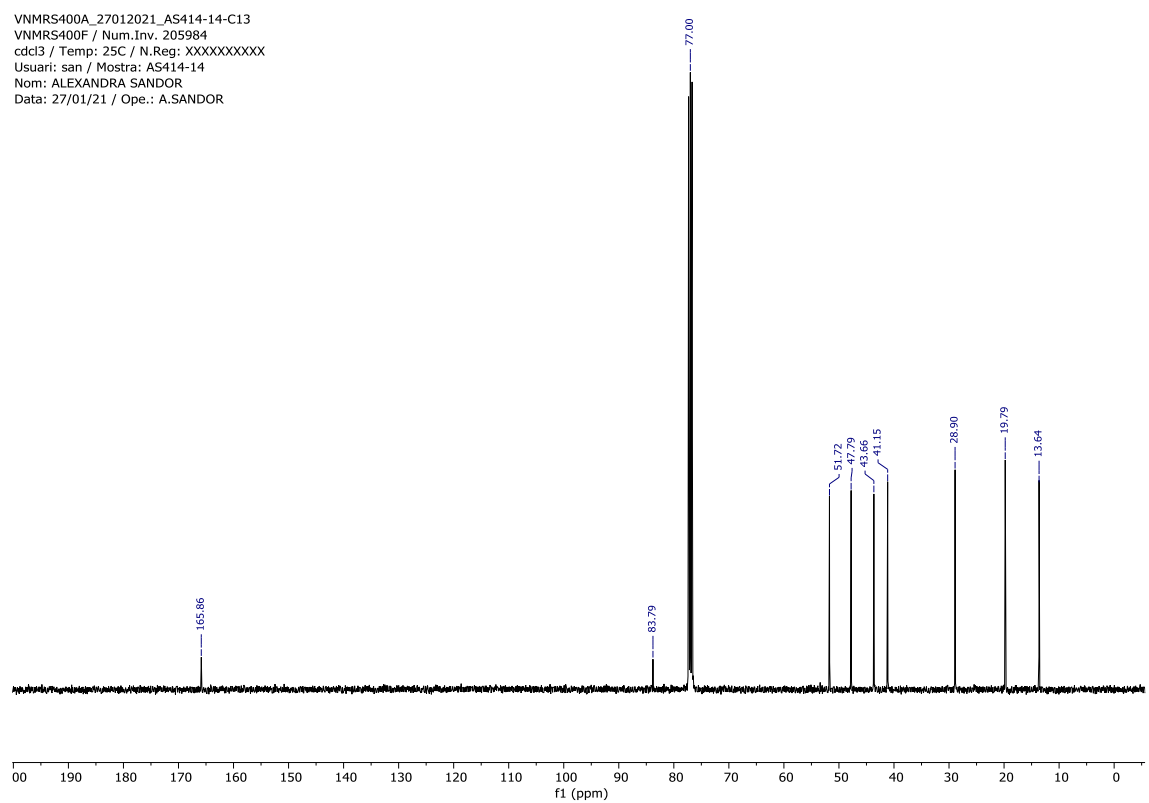

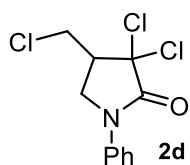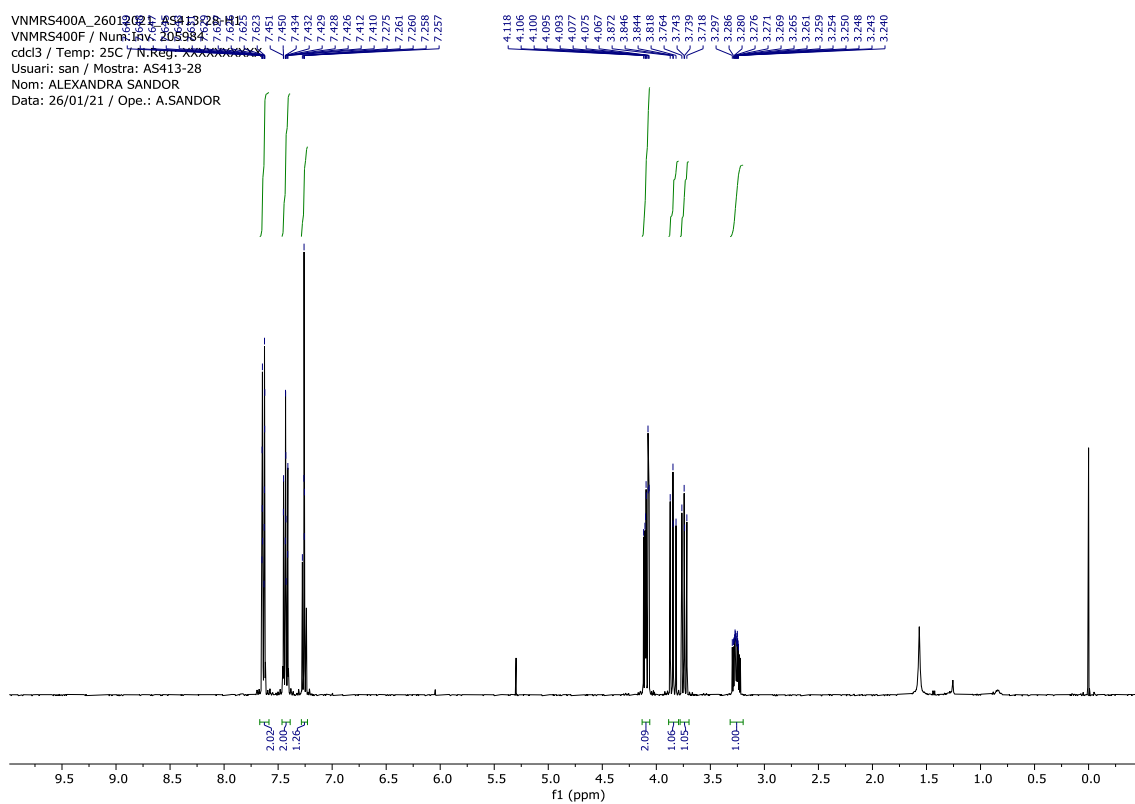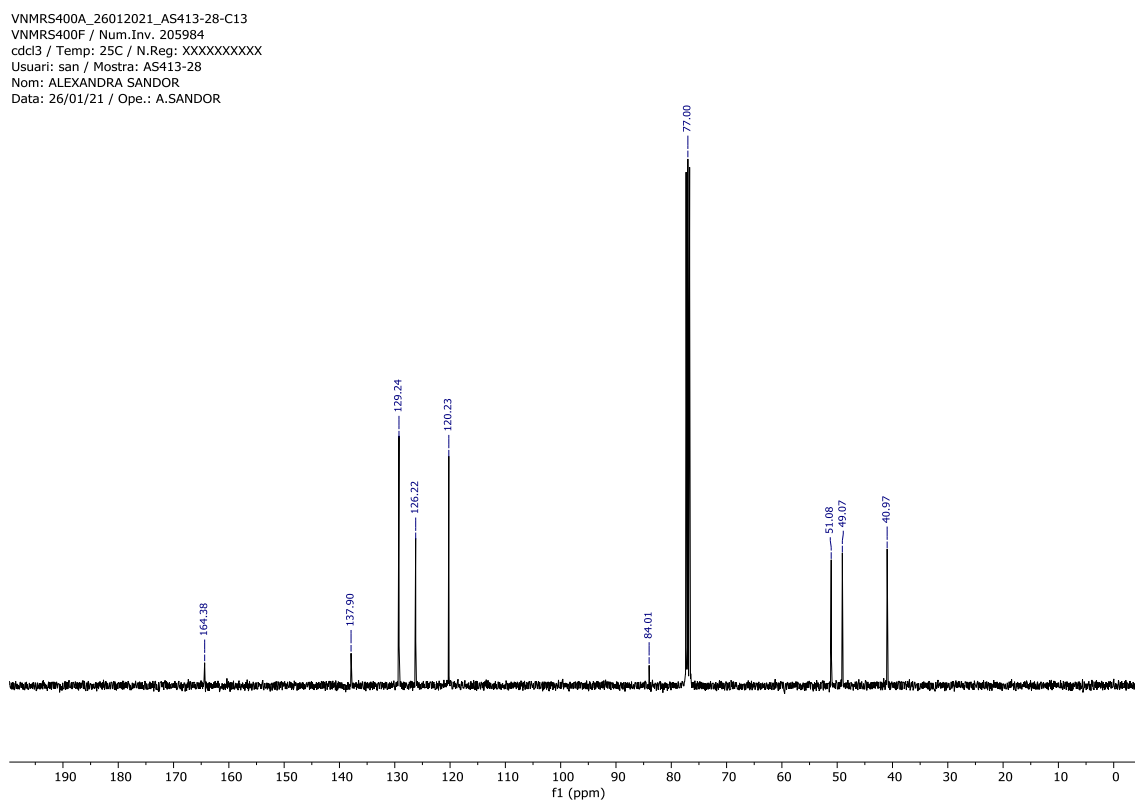

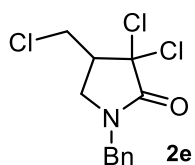

VNMRS400A\_04022021\_as417-8-H1  
 VNMRS400F / Num.Inv. 205984  
 cdc13 / Temp: 25C / N.Reg: XXXXXXXXXX  
 Usuari: san / Mostra: as417-8  
 Nom: ALEXANDRA SANDOR  
 Data: 04/02/21 / Ope.: A.SANDOR

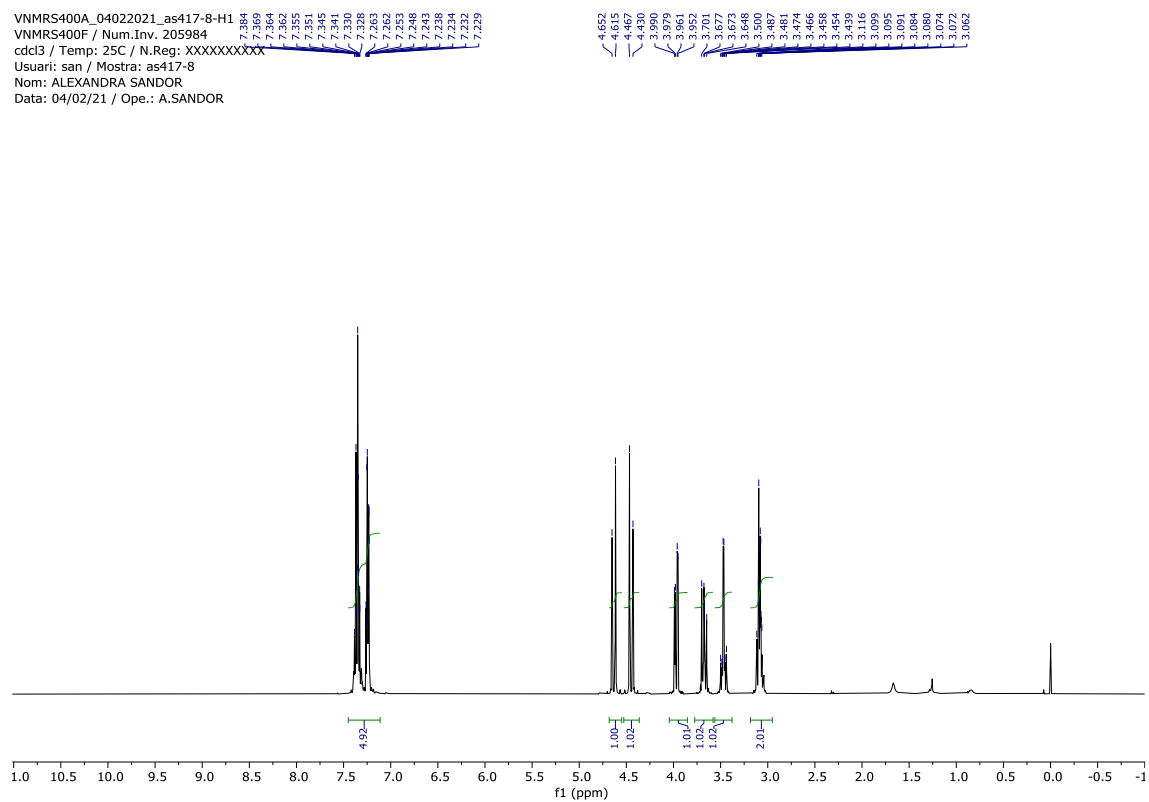

VNMRS400A\_04022021\_as417-8-C13  
 VNMRS400F / Num.Inv. 205984  
 cdc13 / Temp: 25C / N.Reg: XXXXXXXXXX  
 Usuari: san / Mostra: as417-8  
 Nom: ALEXANDRA SANDOR  
 Data: 04/02/21 / Ope.: A.SANDOR

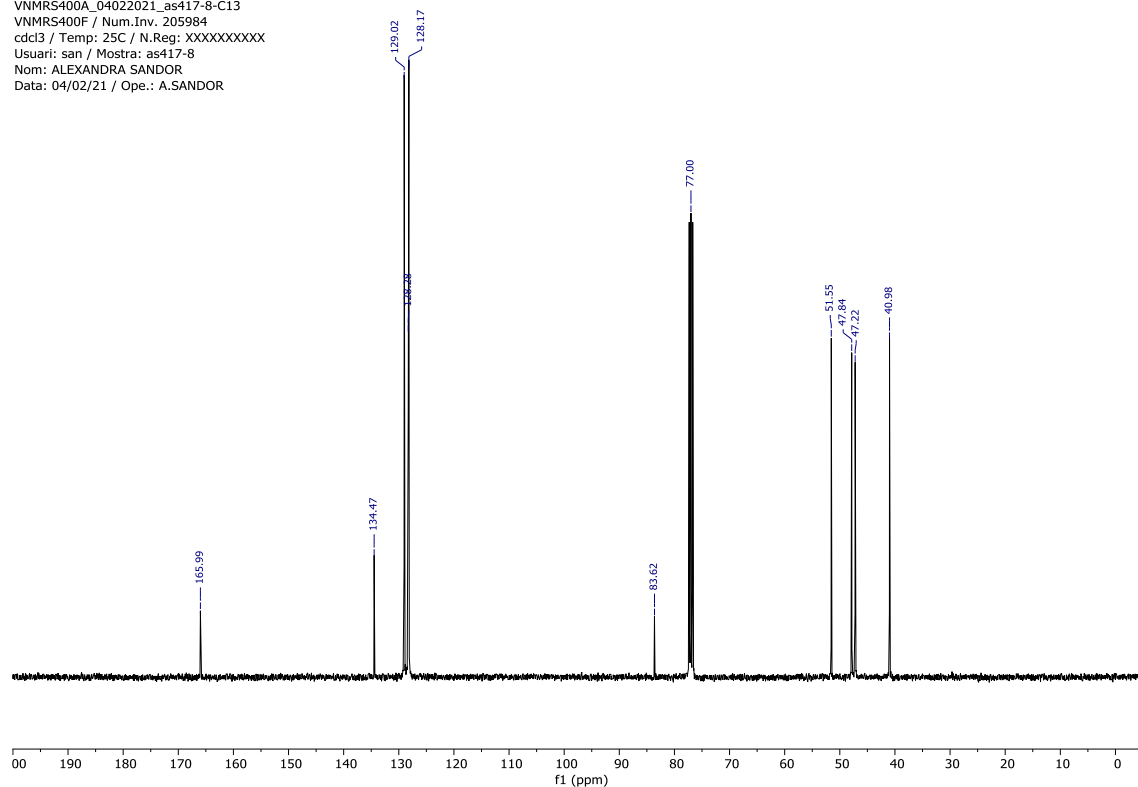

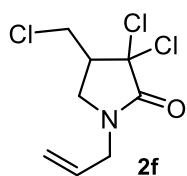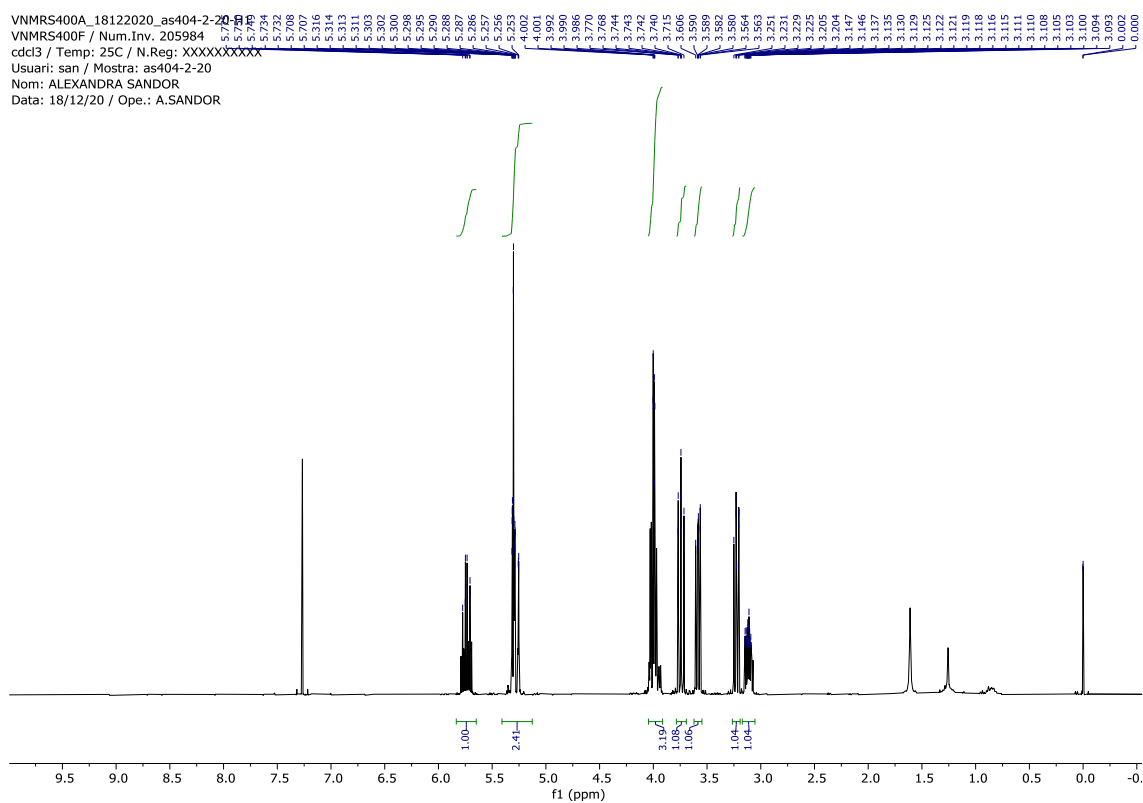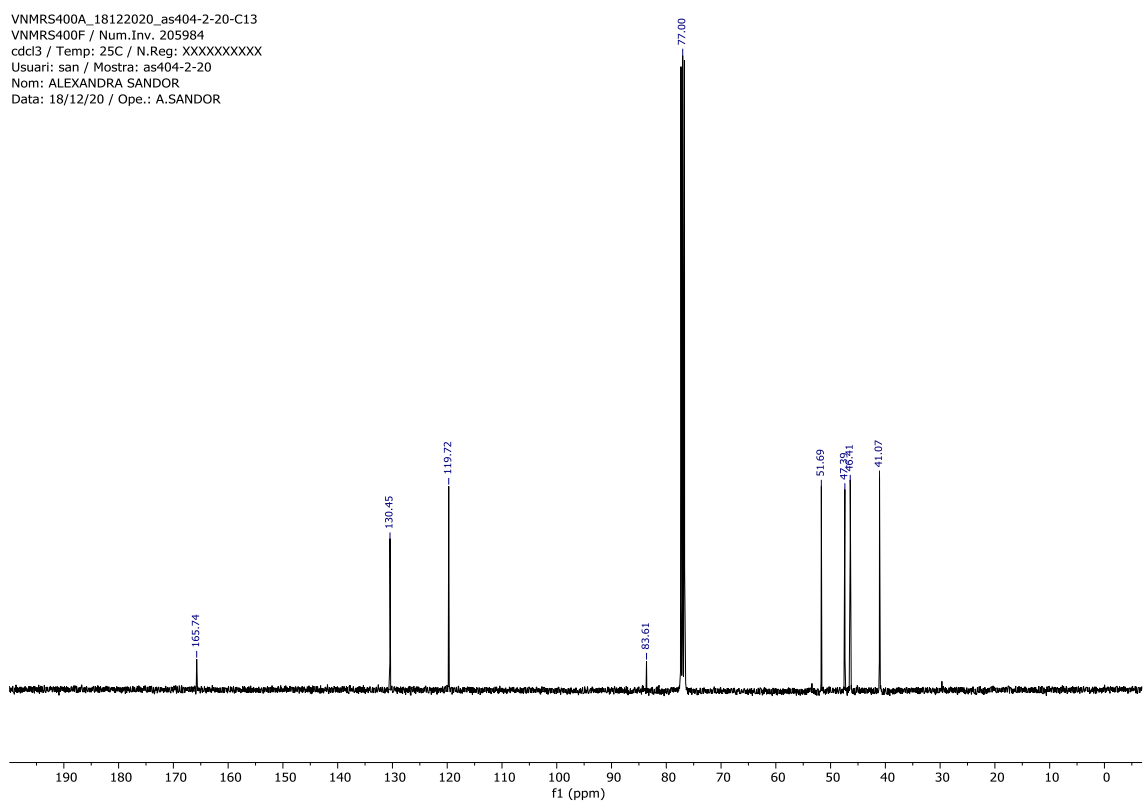



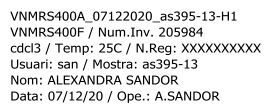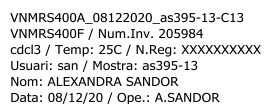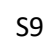

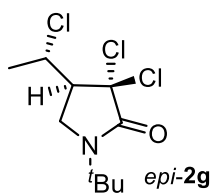

M400AFF\_07122020\_as395-18-H1  
M400F / Num.Inv. 1009191  
cdcl3 / Temp: 25C / N.Reg: XXXXXXXXXX  
Usuari: san / Mostra: as395-18  
Nom: ALEXANDRA SANDOR  
Data: 07/12/20 / Ope.: A.SANDOR

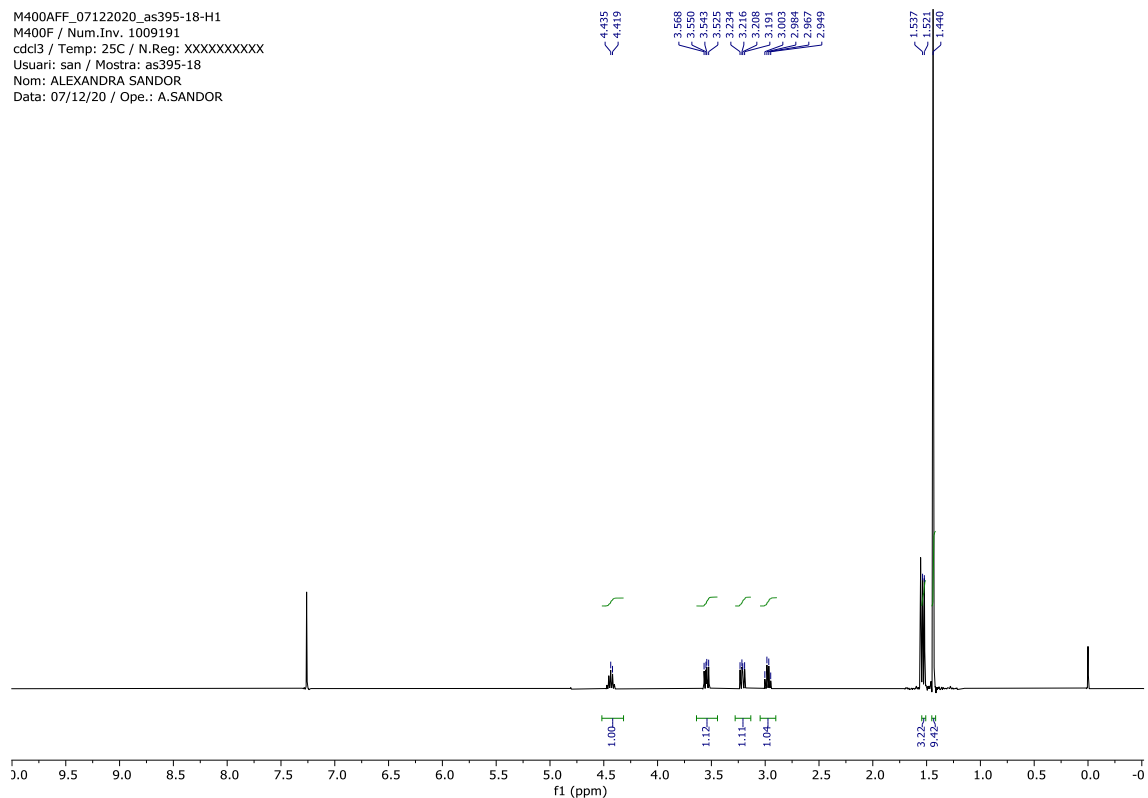

VNMRS400A\_08122020\_as395-18-C13  
VNMRS400F / Num.Inv. 205984  
cdcl3 / Temp: 25C / N.Reg: XXXXXXXXXX  
Usuari: san / Mostra: as395-18  
Nom: ALEXANDRA SANDOR  
Data: 08/12/20 / Ope.: A.SANDOR

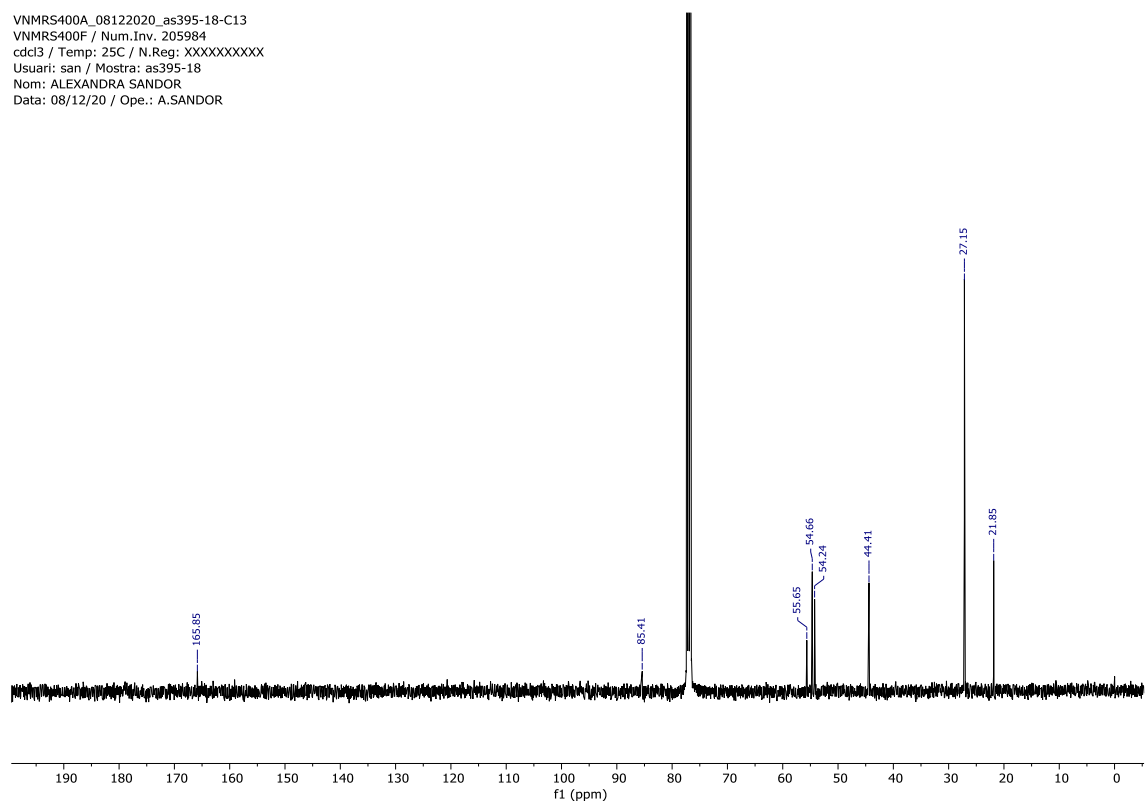

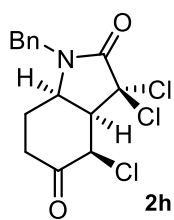

M400AFF\_07122020\_as392-2-all-H1  
M400F / Num.Inv. 1009191  
cdcl3 / Temp: 25C / N.Reg: XXXXXXXXXX  
Usuari: san / Mostra: as392-2-all  
Nom: ALEXANDRA SANDOR  
Data: 07/12/20 / Ope.: A.SANDOR

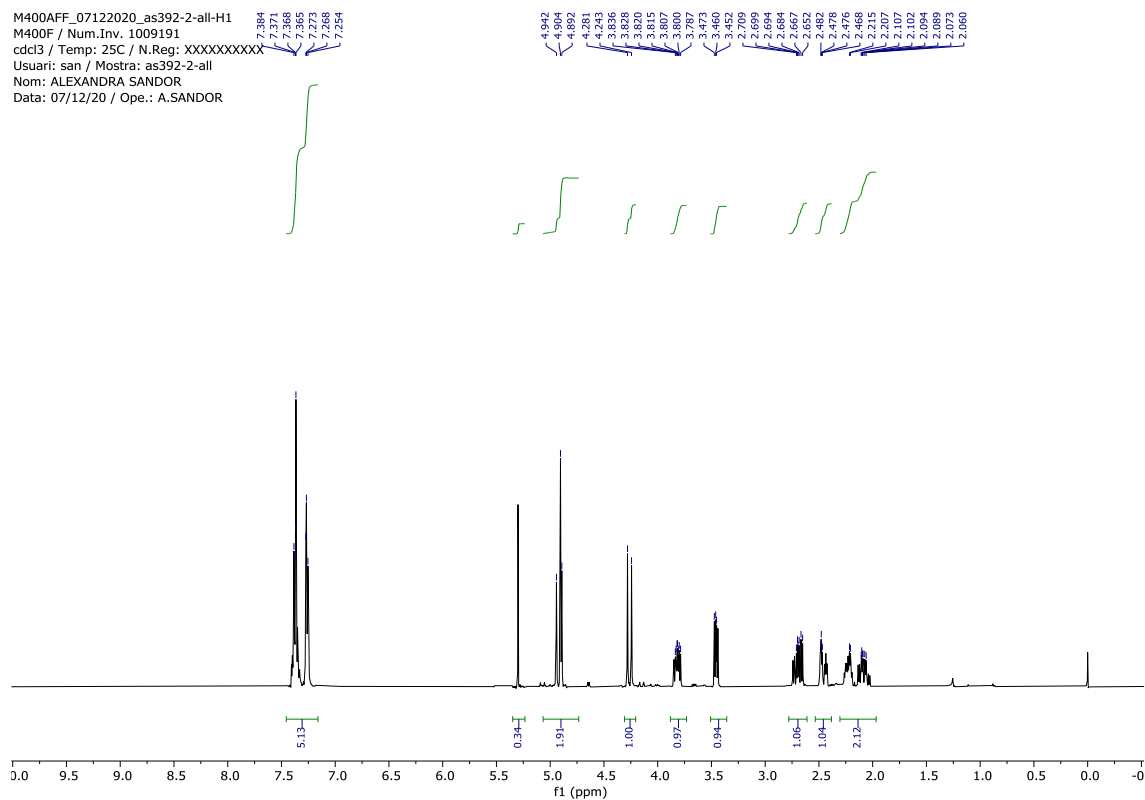

VNMR5400A\_04122020\_as392-2-all-C13  
VNMR5400F / Num.Inv. 205984  
cdcl3 / Temp: 25C / N.Reg: XXXXXXXXXX  
Usuari: san / Mostra: as392-2-all  
Nom: ALEXANDRA SANDOR  
Data: 04/12/20 / Ope.: A.SANDOR

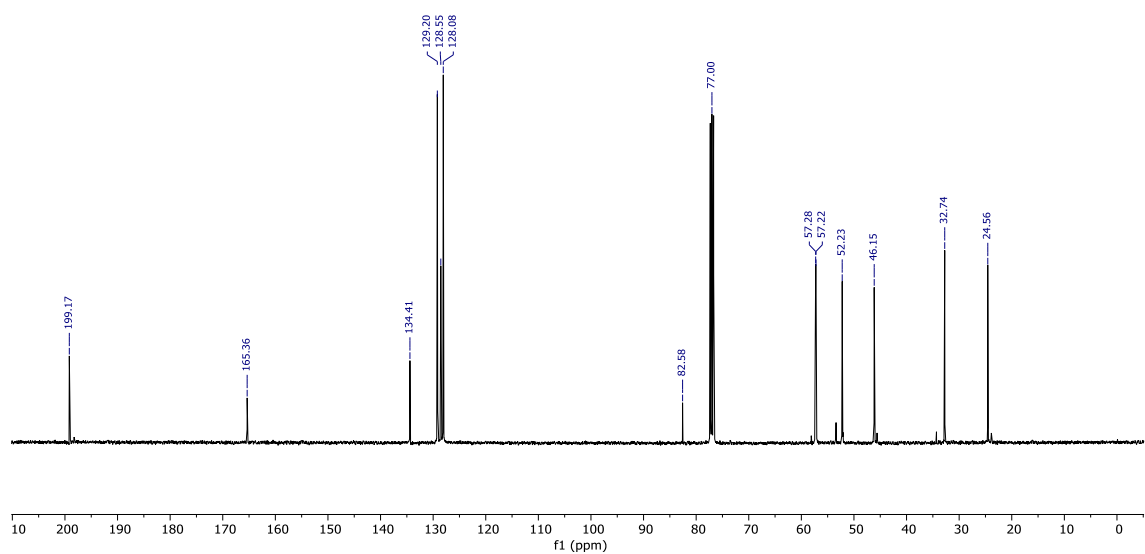

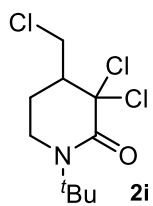

M400AFF\_13122020\_AS400-7-H1\_rep\_20\_18\_01  
M400F / Num.Inv. 1009191  
cdcl3 / Temp: 25C / N.Reg: XXXXXXXXXX  
Usuari: san / Mostra: AS400-7  
Nom: ALEXANDRA SANDOR  
Data: 13/12/20 / Ope.: A.SANDOR

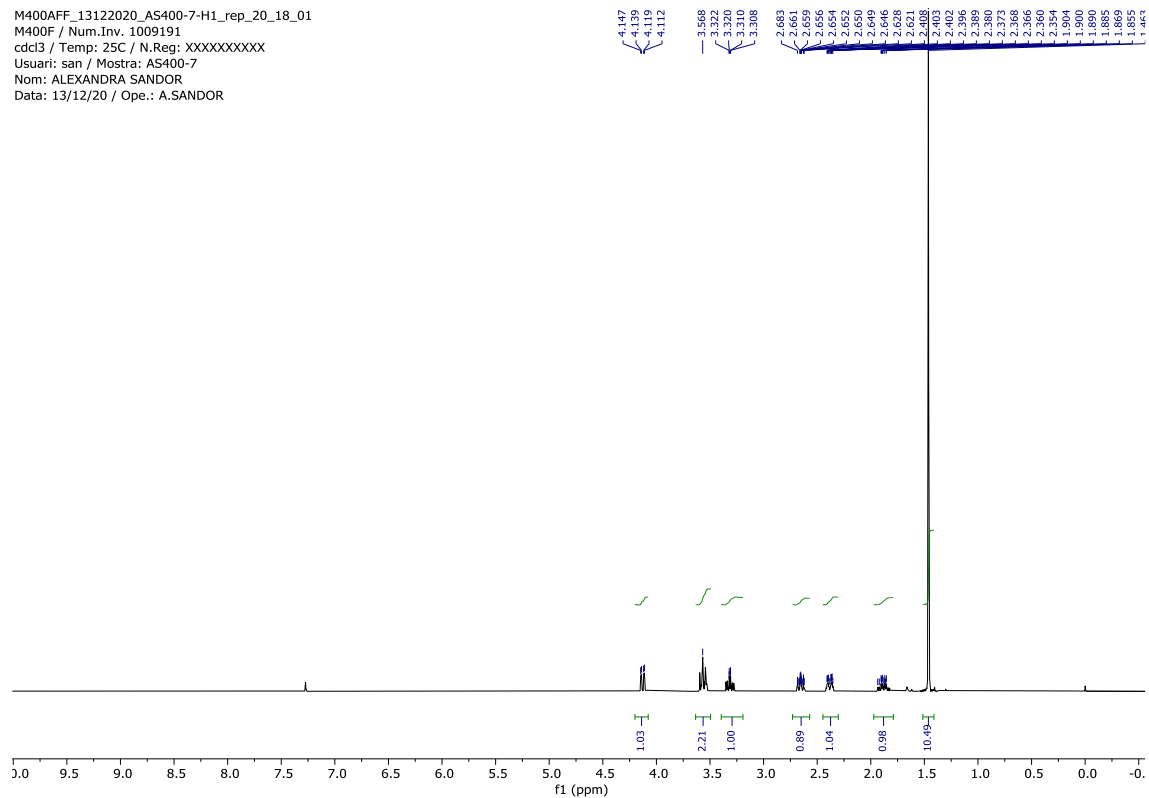

VNMRS400A\_14122020\_as400-7-C13  
VNMRS400F / Num.Inv. 205984  
cdcl3 / Temp: 25C / N.Reg: XXXXXXXXXX  
Usuari: san / Mostra: as400-7  
Nom: ALEXANDRA SANDOR  
Data: 14/12/20 / Ope.: A.SANDOR

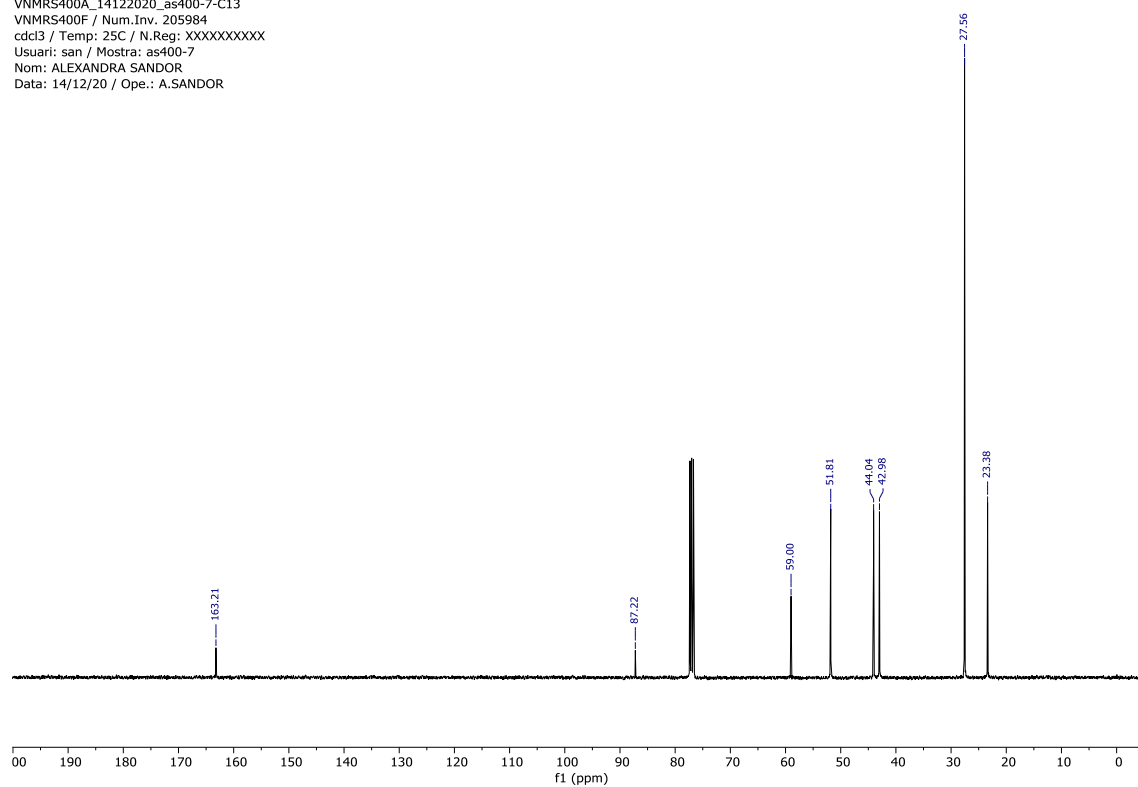

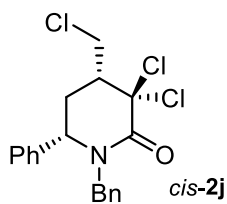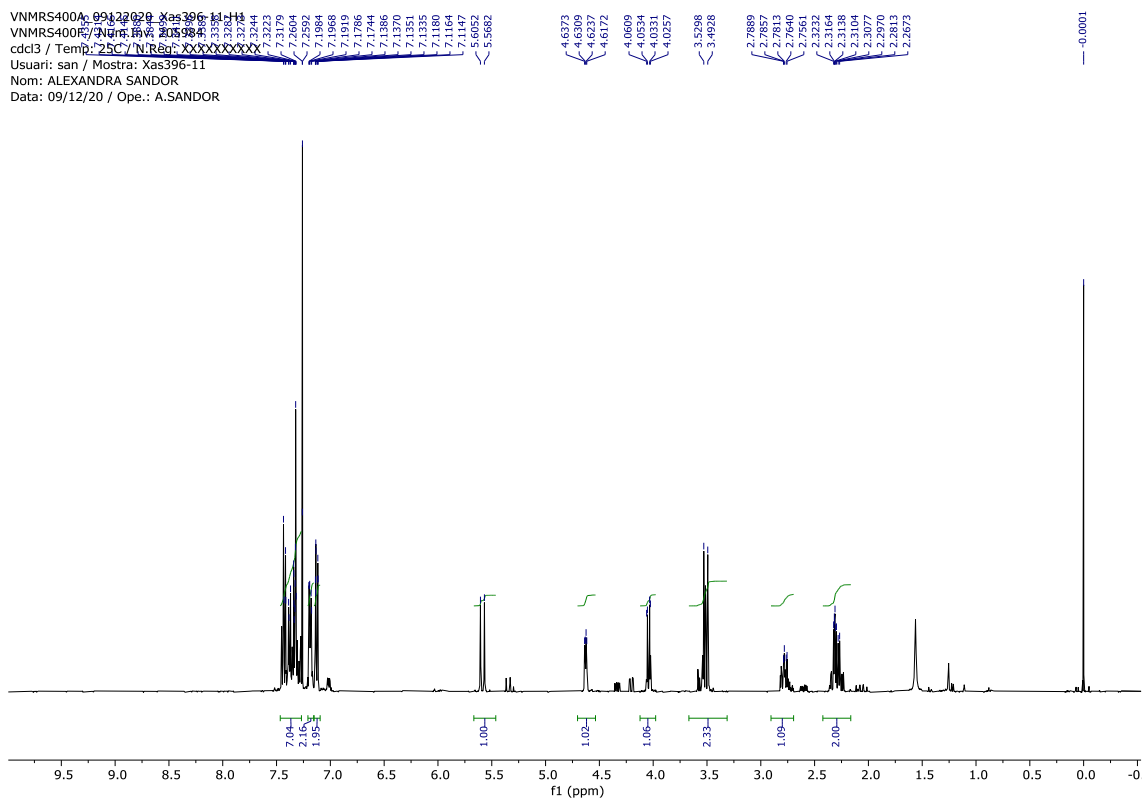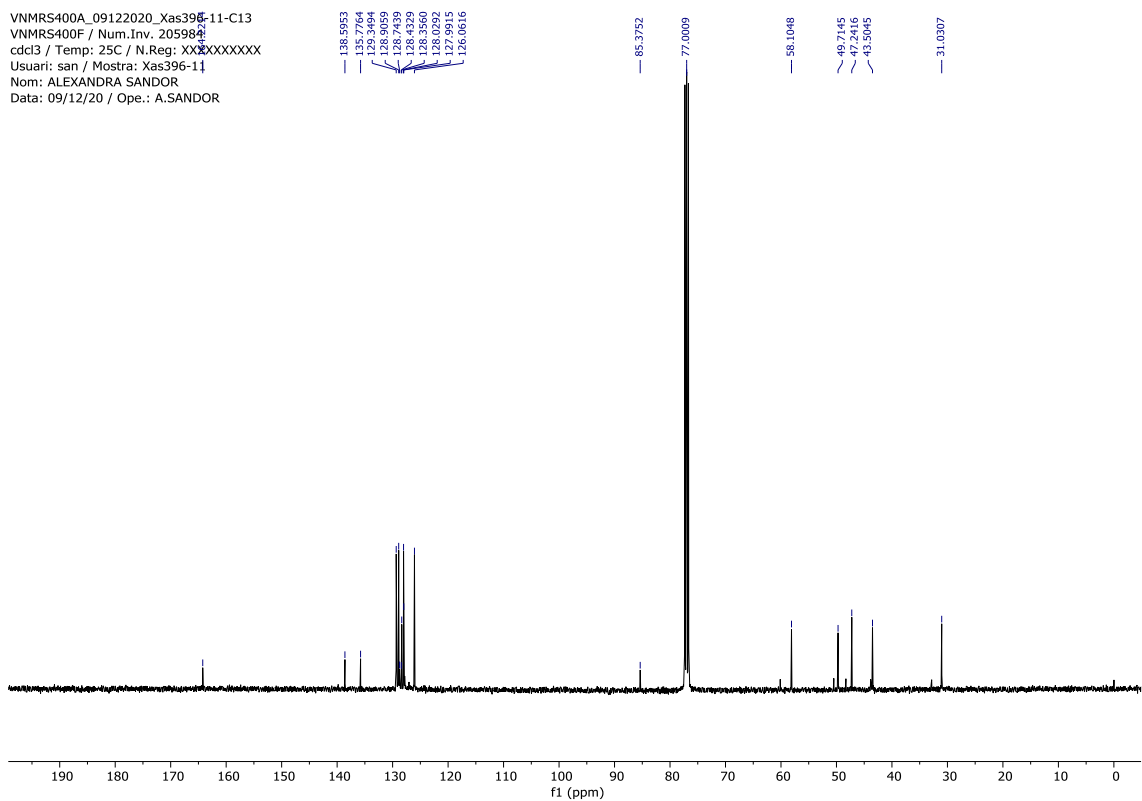

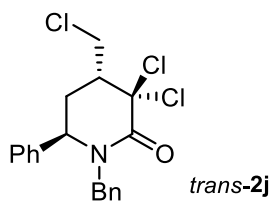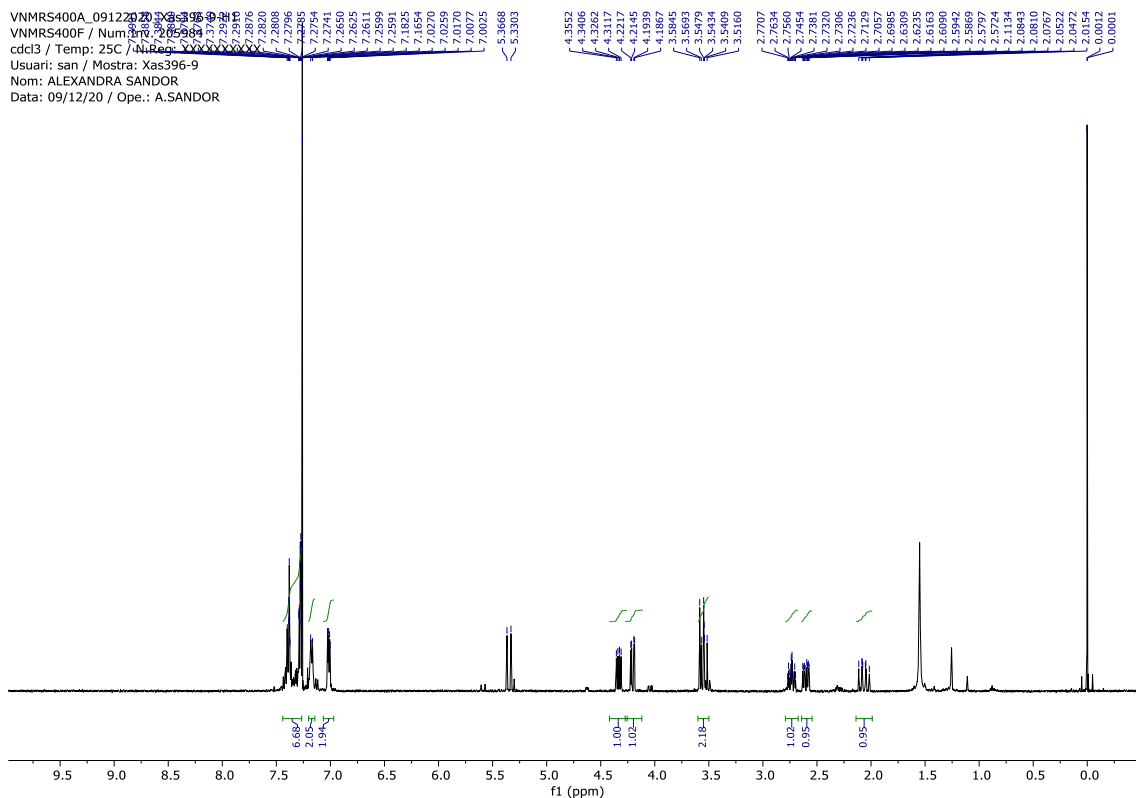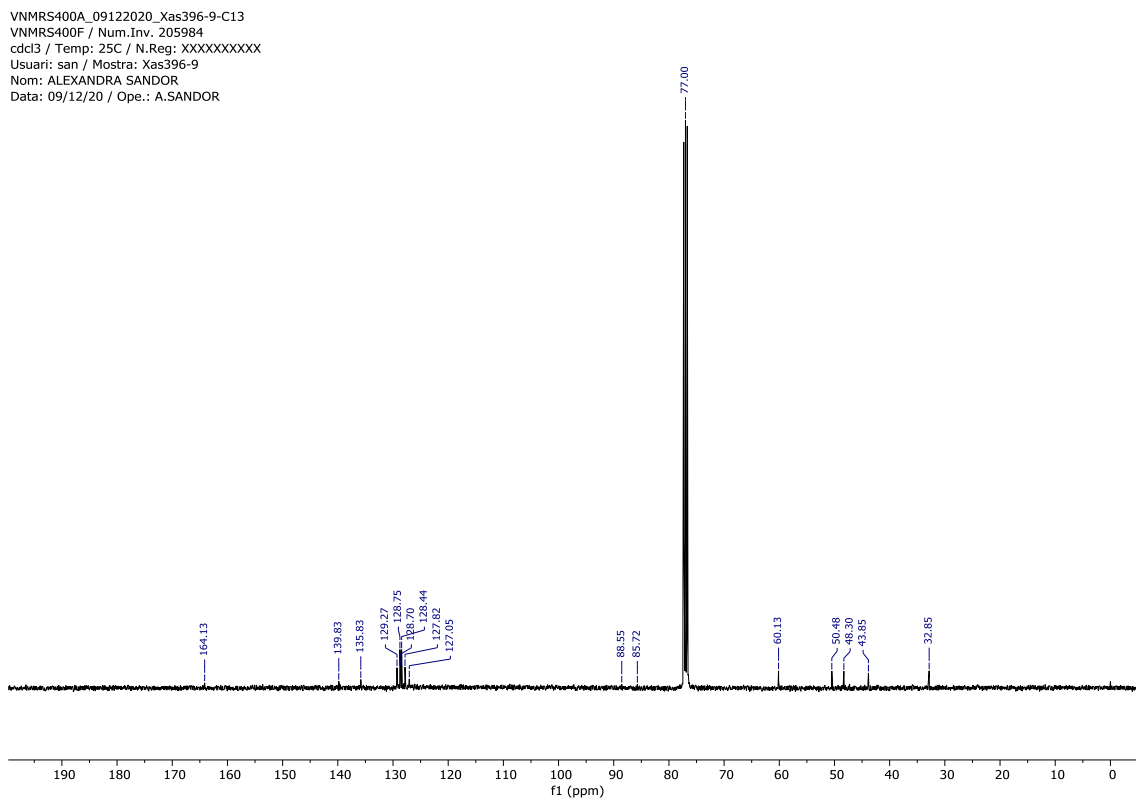

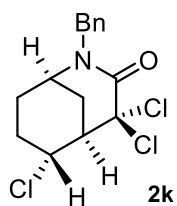

vmrs400\_0503-R47-9CRYSTALS-C13  
H1 / Mercury-400F  
cdcl3 / Temp: Ambient / N.Reg: XXXXXXXXXX  
Usuari: san / Mostra: R47-9CRYSTALS  
Nom: FAIZA DIABA  
Data: 03/05/11 / Ope.: F.DIABA  
Experiment: s2pul

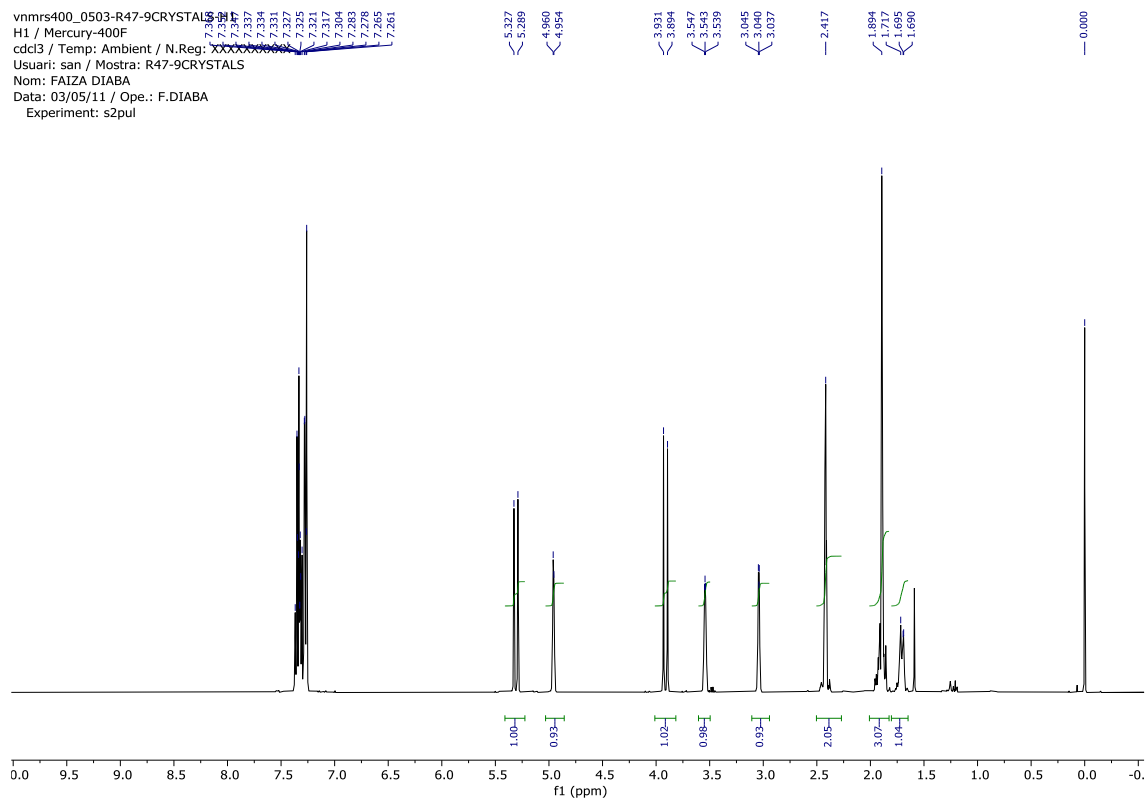

vmrs400\_0503-R47-9CRYSTALS-C13  
H1 / Mercury-400F  
cdcl3 / Temp: Ambient / N.Reg: XXXXXXXXXX  
Usuari: san / Mostra: R47-9CRYSTALS  
Nom: FAIZA DIABA  
Data: 03/05/11 / Ope.: F.DIABA  
Experiment: s2pul

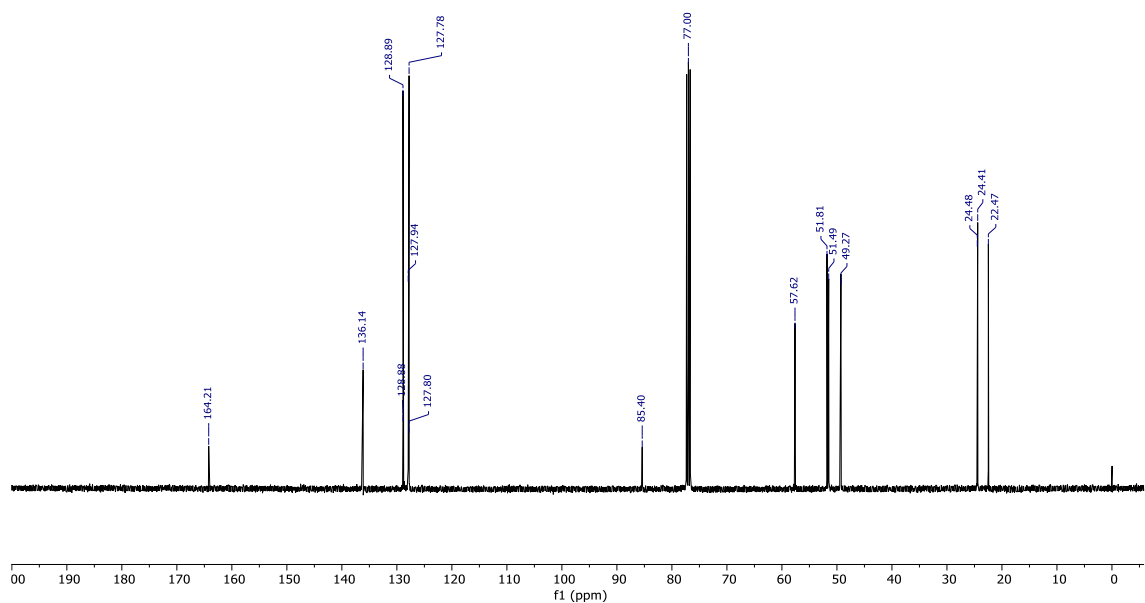

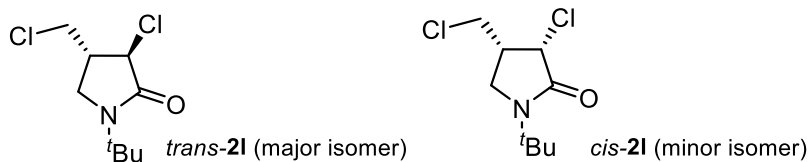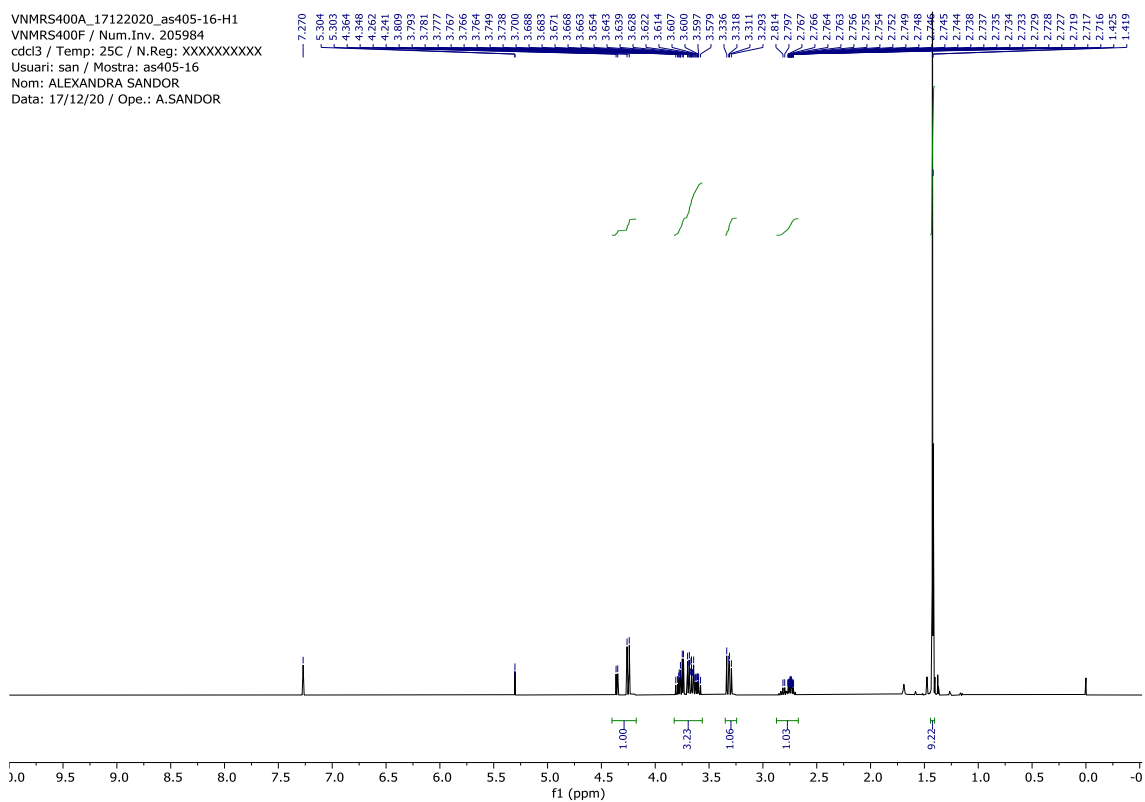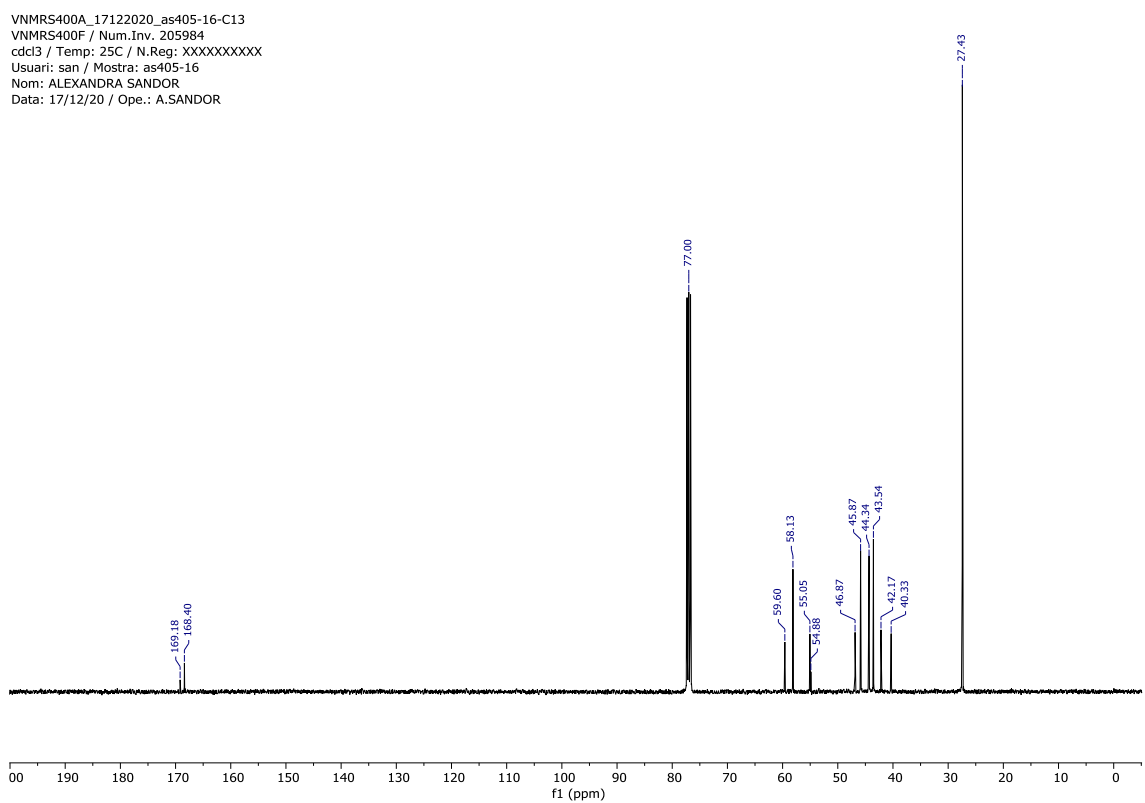



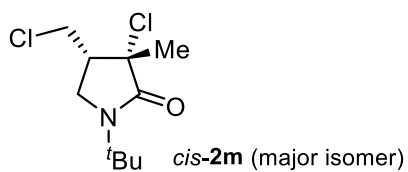

VNMRS400A\_25012021\_yAS411-8-H1\_rep\_15\_56\_10  
 VNMRS400F / Num.Inv. 205984  
 cdcl3 / Temp: 25C / N.Reg: XXXXXXXXXX  
 Usuari: san / Mostra: yAS411-8  
 Nom: FAIZA DIABA  
 Data: 25/01/21 / Ope.: F.DIABA

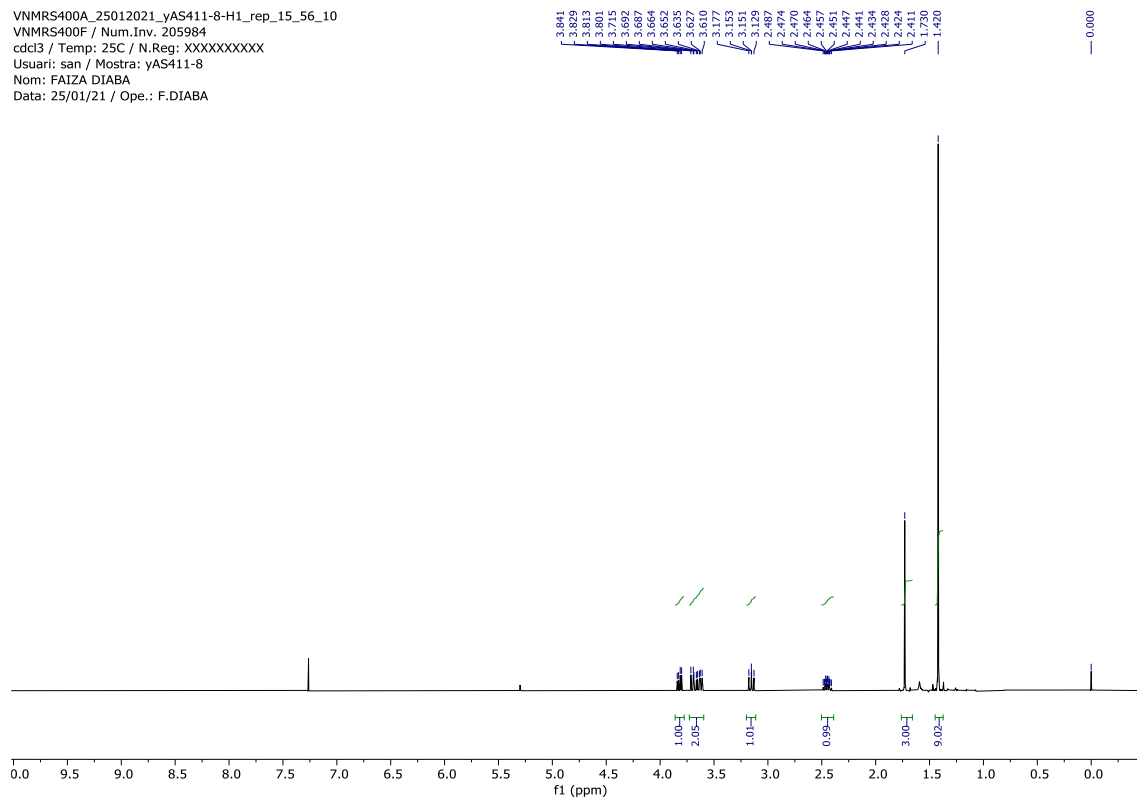

VNMRS400A\_25012021\_XAS411-8-C13  
 VNMRS400F / Num.Inv. 205984  
 cdcl3 / Temp: 25C / N.Reg: XXXXXXXXXX  
 Usuari: san / Mostra: XAS411-8  
 Nom: FAIZA DIABA  
 Data: 25/01/21 / Ope.: F.DIABA

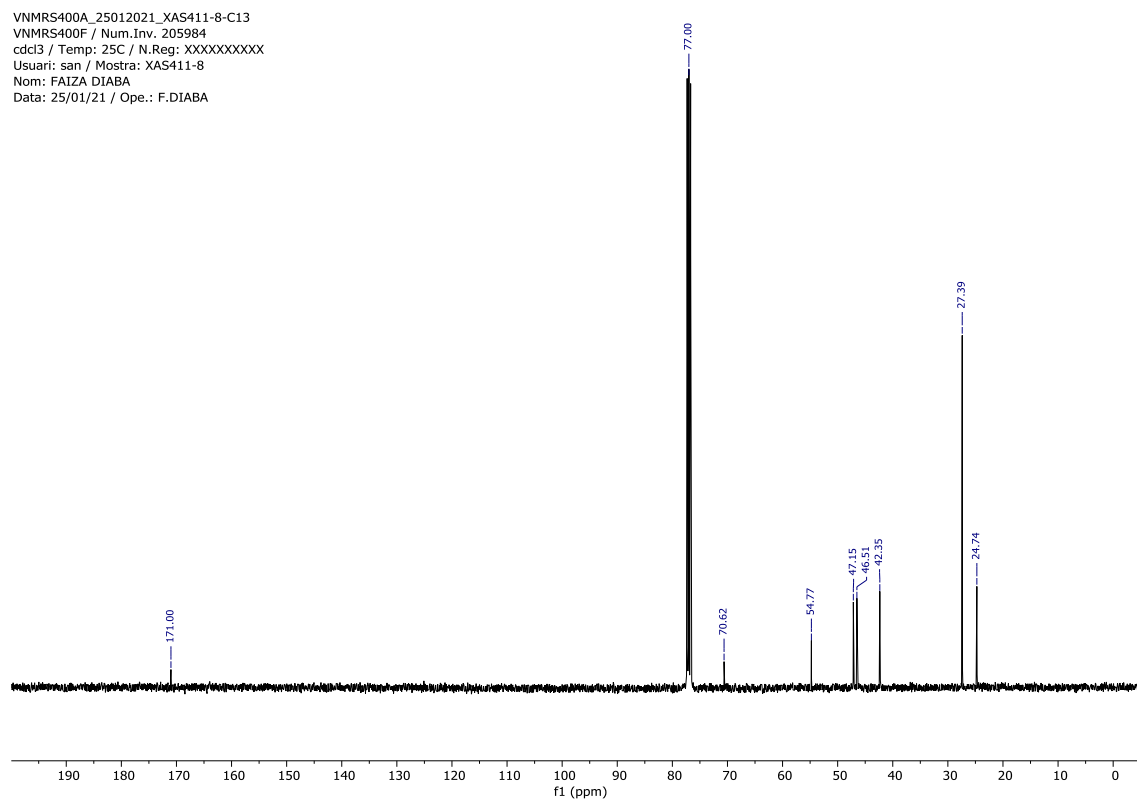

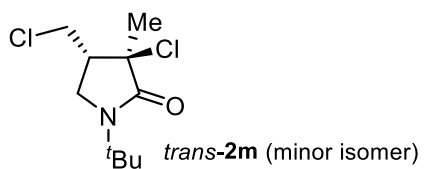

VNMRS400A\_26012021\_AS411-2-19-H1\_rep\_22\_54\_43  
 VNMRS400F / Num.Inv. 205984  
 cdc13 / Temp: 25C / N.Reg: XXXXXXXXXX  
 Usuari: san / Mostra: AS411-2-19  
 Nom: ALEXANDRA SANDOR  
 Data: 26/01/21 / Ope.: A.SANDOR

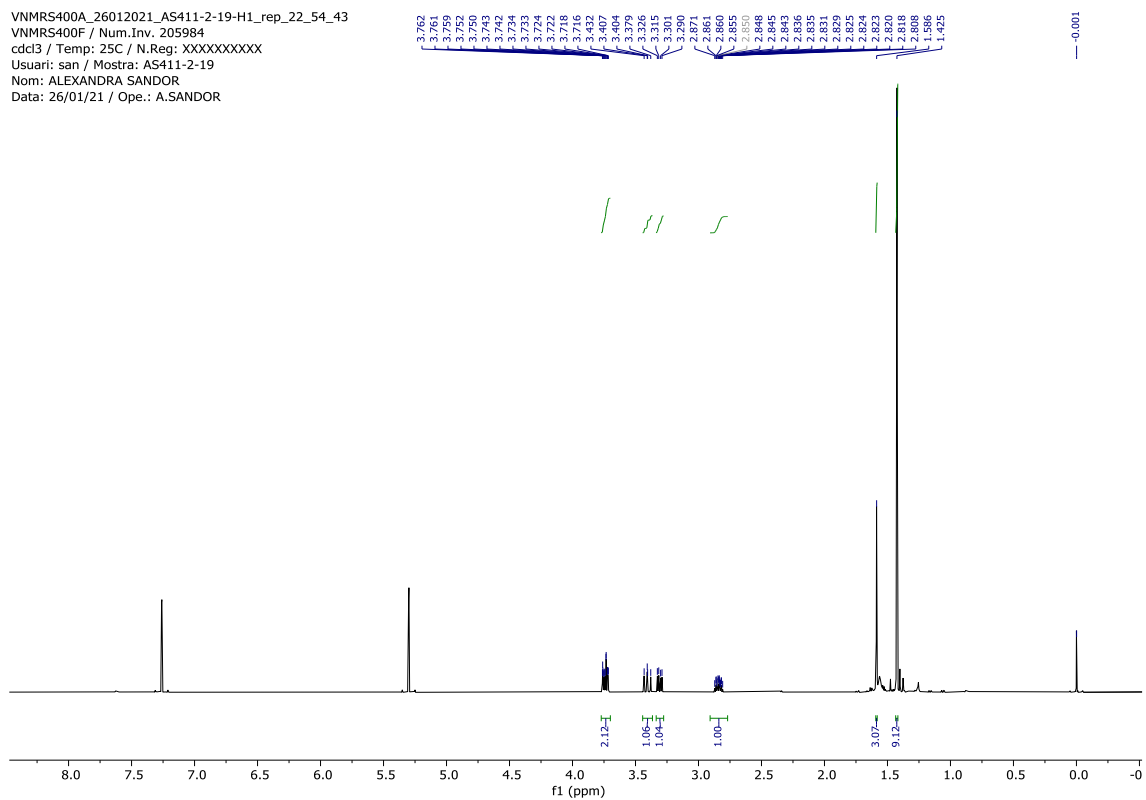

VNMRS400A\_26012021\_AS411-2-19-C13  
 VNMRS400F / Num.Inv. 205984  
 cdc13 / Temp: 25C / N.Reg: XXXXXXXXXX  
 Usuari: san / Mostra: AS411-2-19  
 Nom: ALEXANDRA SANDOR  
 Data: 26/01/21 / Ope.: A.SANDOR

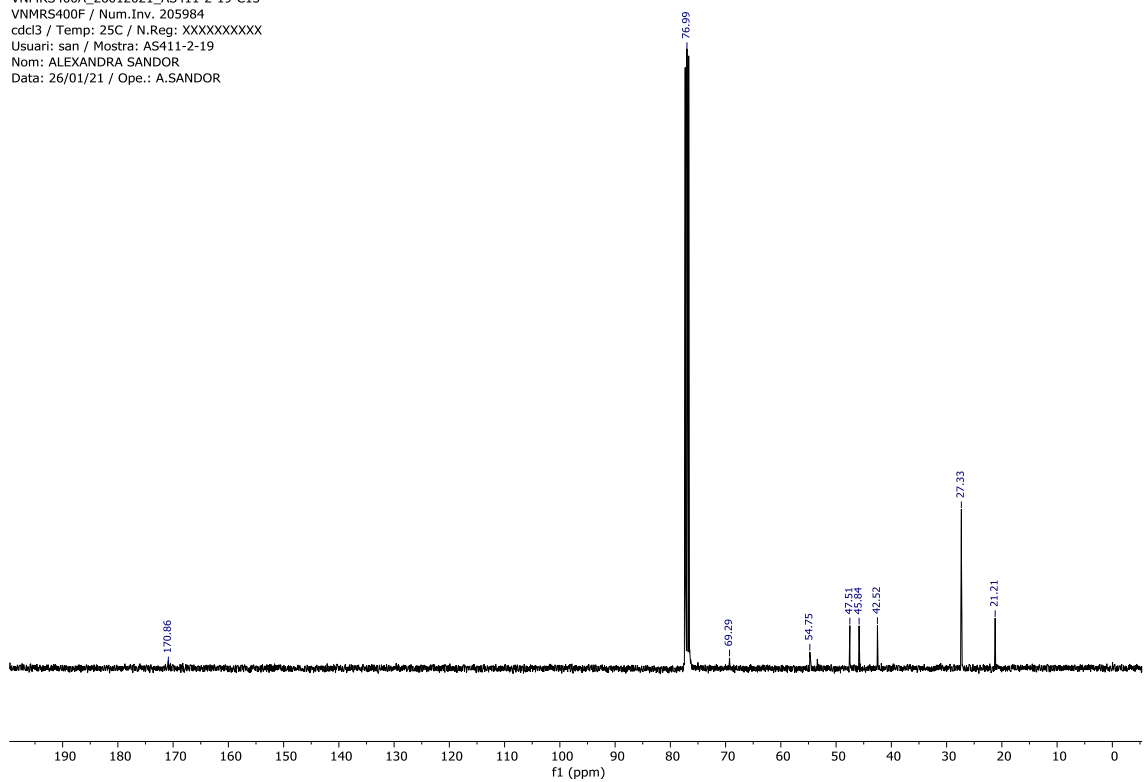

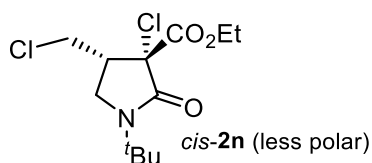

M400AFF\_15122020\_AS401-2-8-H1  
M400F / Num.Inv. 1009191  
cdcl3 / Temp: 25C / N.Reg: XXXXXXXXXX  
Usuari: san / Mostra: AS401-2-8  
Nom: ALEXANDRA SANDOR  
Data: 15/12/20 / Ope.: A.SANDOR

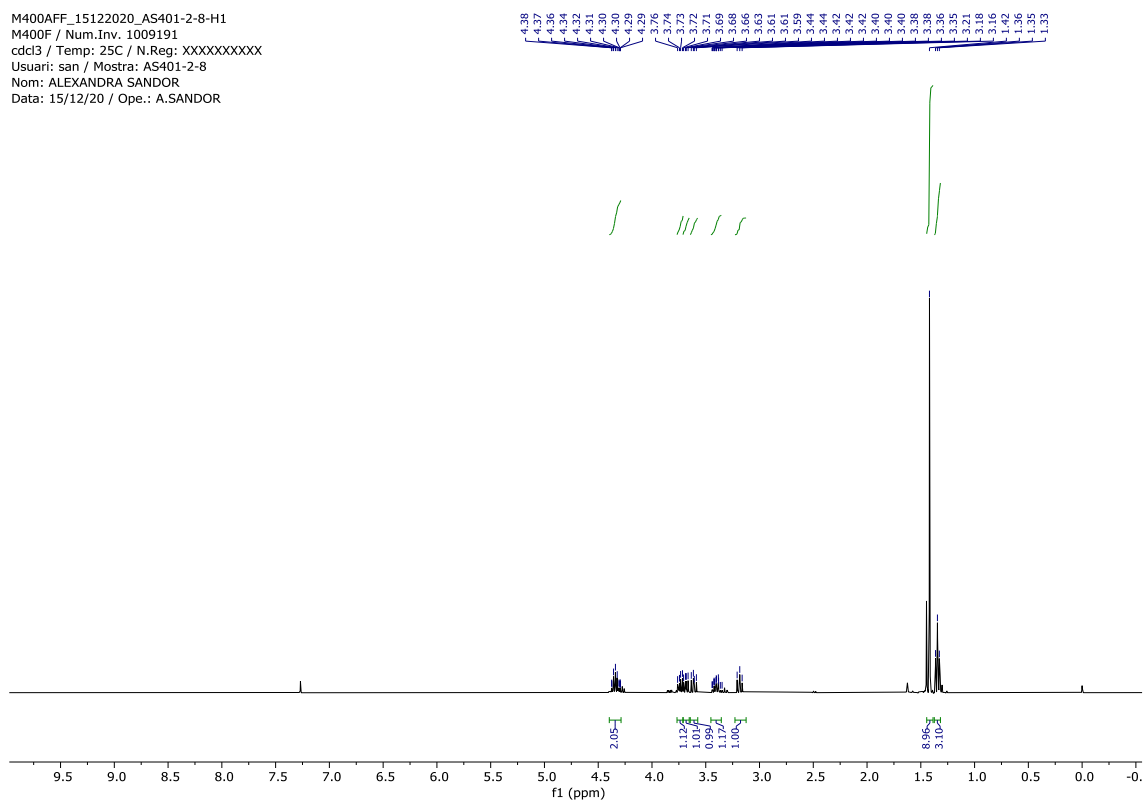

VNMRS400A\_17122020\_as401-2-8-C13  
VNMRS400F / Num.Inv. 205984  
cdcl3 / Temp: 25C / N.Reg: XXXXXXXXXX  
Usuari: san / Mostra: as401-2-8  
Nom: ALEXANDRA SANDOR  
Data: 17/12/20 / Ope.: A.SANDOR

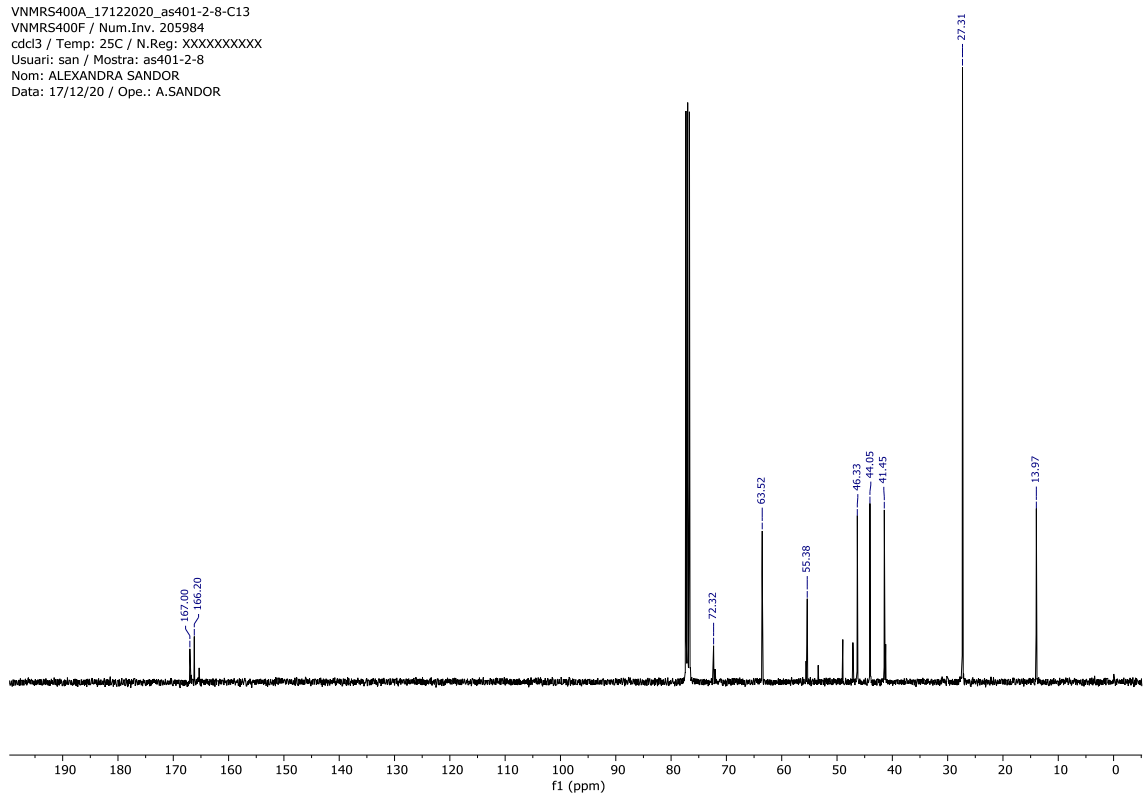

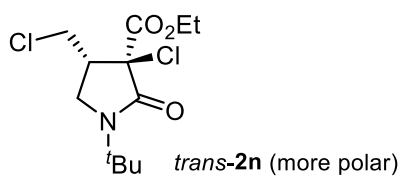

VNMRS400A\_16122020\_as401-2-16-H1  
 VNMRS400F / Num.Inv. 205984  
 cdcl3 / Temp: 25C / N.Reg: XXXXXXXXXX  
 Usuari: san / Mostra: as401-2-16  
 Nom: ALEXANDRA SANDOR  
 Data: 16/12/20 / Ope.: A.SANDOR

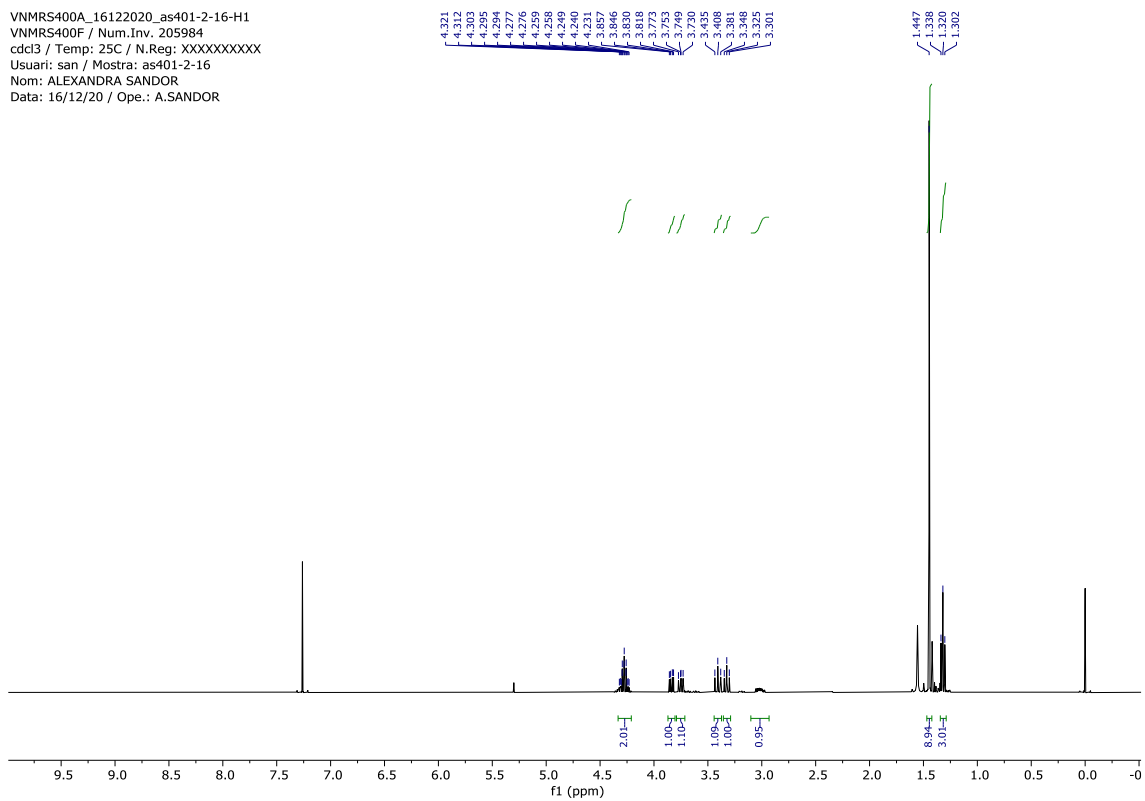

VNMRS400A\_16122020\_as401-2-16-C13  
 VNMRS400F / Num.Inv. 205984  
 cdcl3 / Temp: 25C / N.Reg: XXXXXXXXXX  
 Usuari: san / Mostra: as401-2-16  
 Nom: ALEXANDRA SANDOR  
 Data: 16/12/20 / Ope.: A.SANDOR

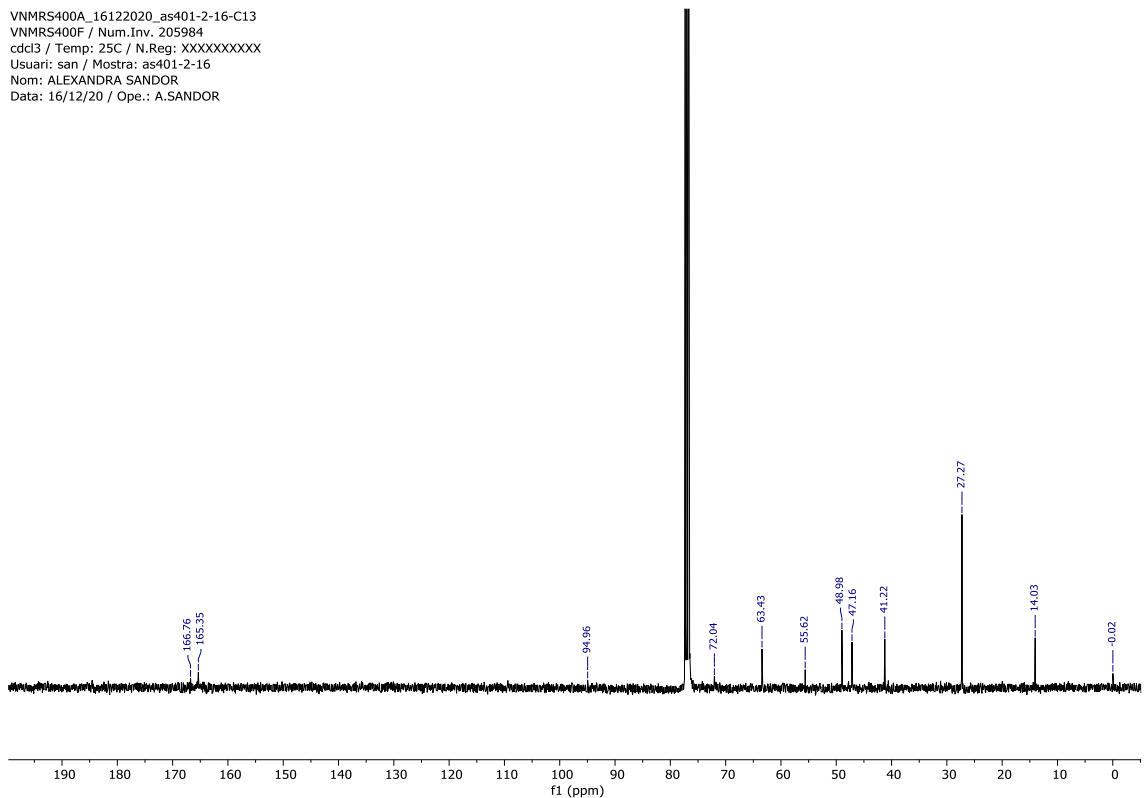

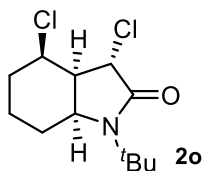

VNMRS400A\_28012021\_AS415-2-10-H1  
 VNMRS400F / Num.Inv. 205984  
 cdcl3 / Temp: 25C / N.Reg: XXXXXXXXXX  
 Usuari: san / Mostra: AS415-2-10  
 Nom: ALEXANDRA SANDOR  
 Data: 28/01/21 / Ope.: A.SANDOR

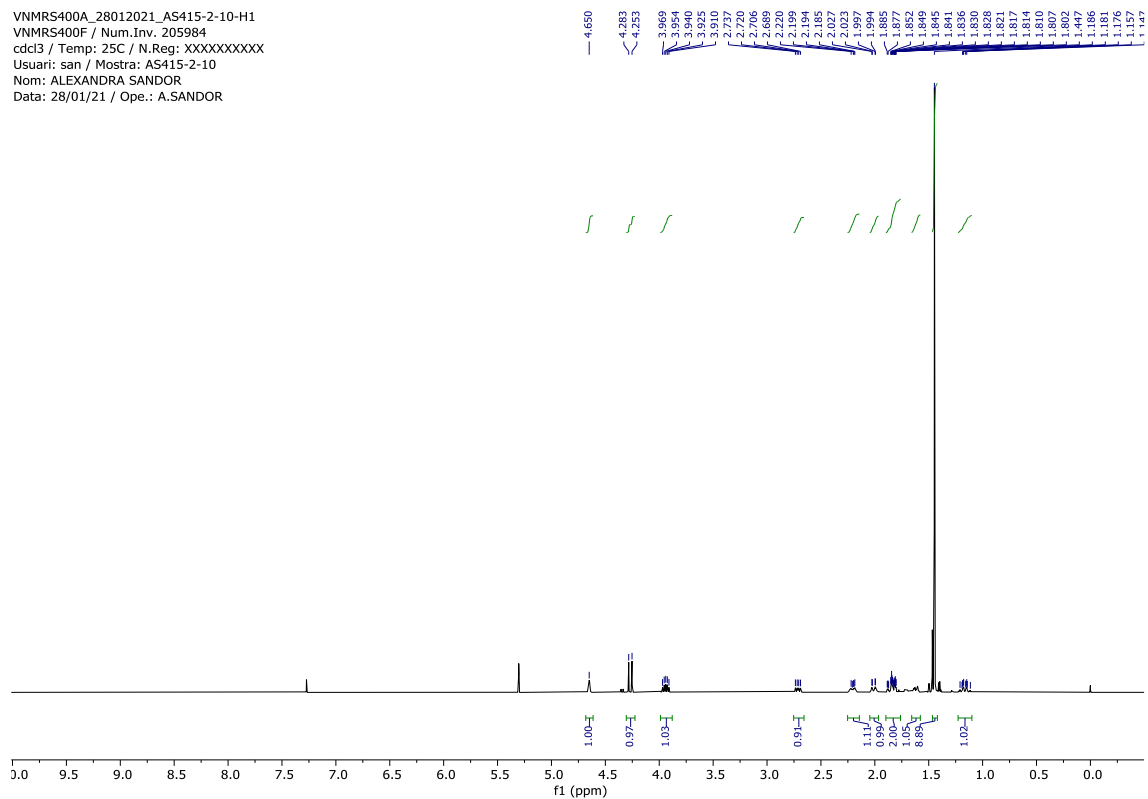

VNMRS400A\_28012021\_AS415-2-10-C13  
 VNMRS400F / Num.Inv. 205984  
 cdcl3 / Temp: 25C / N.Reg: XXXXXXXXXX  
 Usuari: san / Mostra: AS415-2-10  
 Nom: ALEXANDRA SANDOR  
 Data: 28/01/21 / Ope.: A.SANDOR

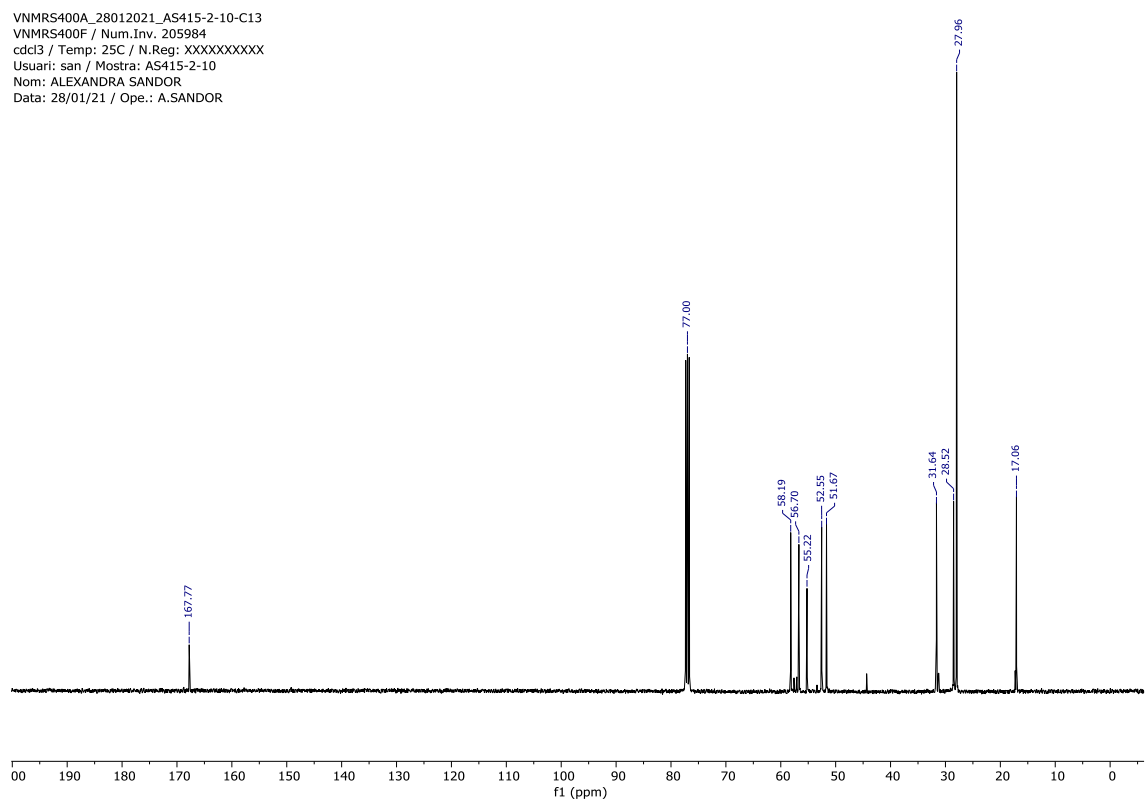

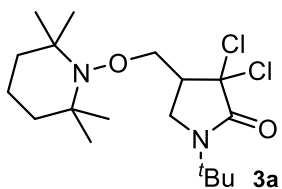

M400AQUI\_17062021\_XGT323-12-18-H1  
M400Q / Num.Inv. AF/004285  
cdcl3 / Temp: 25C / N.Reg: XXXXXXXXXX  
Usuari: san / Mostra: XGT323-12-18  
Nom: GISELA TRENCHS MIR  
Data: 17/06/21 / Ope.: G.TRENCHS

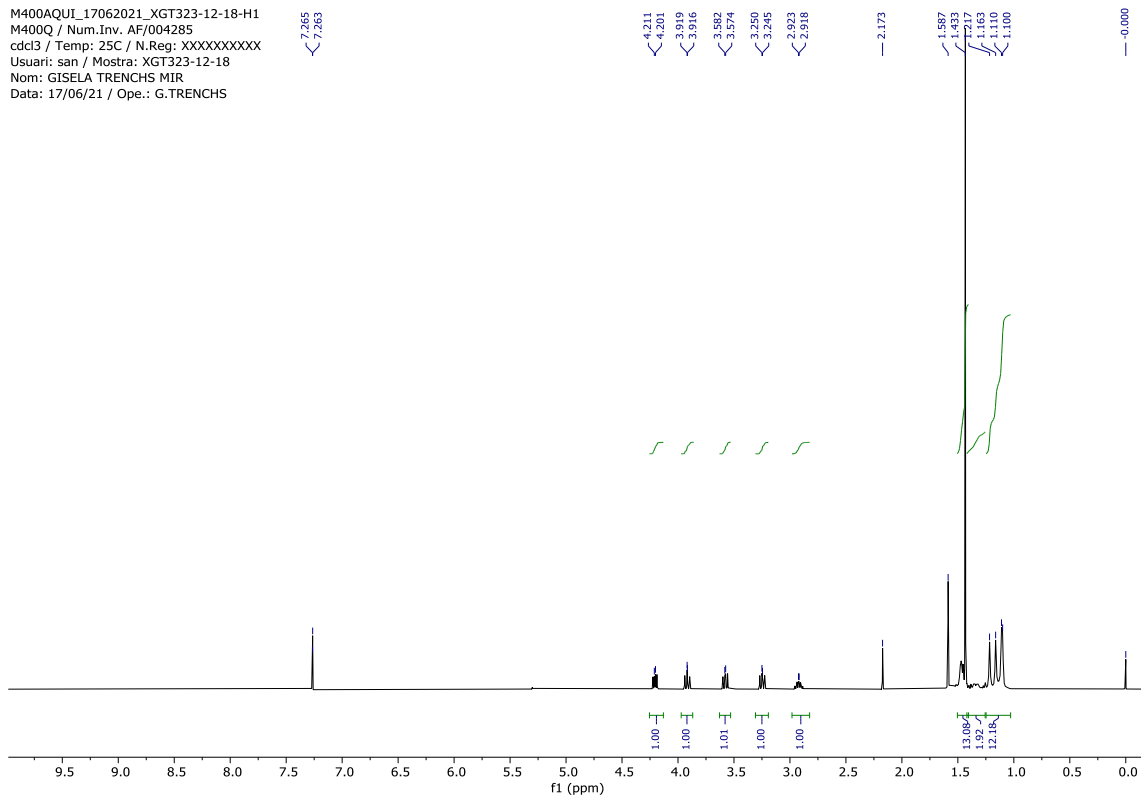

M400AQUI\_17062021\_XGT323-12-18-C13  
M400Q / Num.Inv. AF/004285  
cdcl3 / Temp: 25C / N.Reg: XXXXXXXXXX  
Usuari: san / Mostra: XGT323-12-18  
Nom: GISELA TRENCHS MIR  
Data: 17/06/21 / Ope.: G.TRENCHS

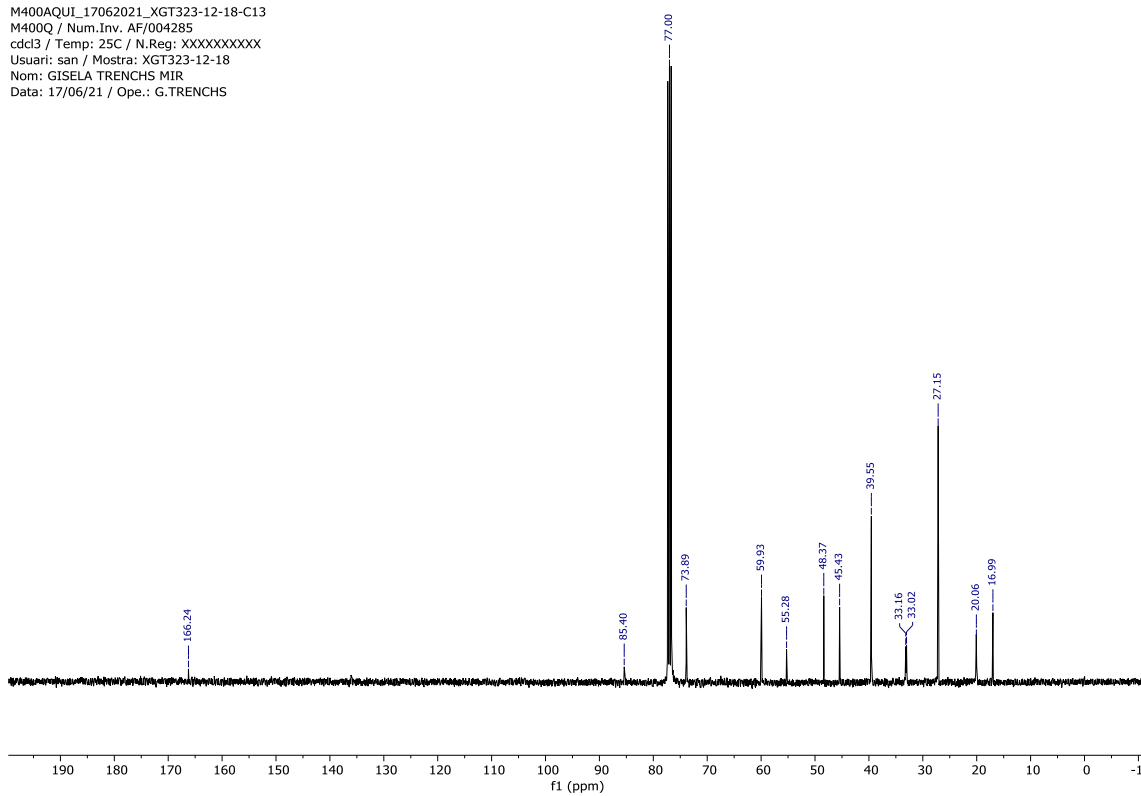

Supplement: s1 [file s1]
